# Antipsychotic management in primary care: a longitudinal population-based study

**Short title: Trends in antipsychotic management in primary care**

**Alan Woodall<sup>1,2</sup>, Alex Gampel<sup>2</sup>, Huw Collins<sup>3†</sup>, Lauren E Walker<sup>4</sup>, Frances S Mair<sup>5</sup>, Sally Sheard<sup>6</sup>, Pyers Symon<sup>7</sup>, Iain Buchan<sup>7,8\*</sup>**

<sup>1</sup>Department of General Practice and Mental Health, Institute of Population Health, University of Liverpool, Liverpool, United Kingdom.

<sup>2</sup>Powys Teaching Health Board, Bronllys, Brecon, Powys, United Kingdom.

<sup>3</sup>Secure Anonymised Information Linkage Databank, Data Science Building, Swansea University, Swansea, United Kingdom

<sup>4</sup>Centre for Experimental Therapeutics, University of Liverpool, Liverpool,, United Kingdom

<sup>5</sup>Department of General Practice and Primary Care, School of Health and Wellbeing, University of Glasgow, Glasgow, United Kingdom

<sup>6</sup>Department of Public Health, Policy and Systems, Institute of Population Health, University of Liverpool, Liverpool, United Kingdom

<sup>7</sup>NIHR Mental Health Research for Innovation Centre, University of Liverpool, Liverpool, United Kingdom

<sup>8</sup>Civic Health Innovation Labs, University of Liverpool, Liverpool, United Kingdom

\*Corresponding author: Iain Buchan - [buchan@liverpool.ac.uk](mailto:buchan@liverpool.ac.uk)

†NOTE: This preprint reports new research that has not been certified by peer review and should not be used to guide clinical practice.  
Deceased

21

22 ORCID IDs and emails:

23 Alan Woodall: 0000-0003-2933-0508 alan.woodall@wales.nhs.uk

24 Alex Gampel: 0000-0001-6923-5818 alexandra.gampel@wales.nhs.uk

25 Huw Collins (deceased; no ORCID/email provided)

26 Lauren Walker: 0000-0002-3827-4387 lauren.walker@liverpool.ac.uk

27 Frances Mair: 0000-0001-9780-1135 frances.mair@glasgow.ac.uk

28 Sally Sheard: 0000-0001-8116-9120 sheard@liverpool.ac.uk

29 Piers Symon: 0009-0001-6499-8442 piers.symon@zen.co.uk (public advisor)

30 Iain Buchan: 0000-0003-3392-1650 buchan@liverpool.ac.uk

31

32

### 33     **Abbreviations**

34     APM-    Antipsychotic Medication

35     GP-       General Practitioner (Family Medicine physician outside the UK)

36     NICE-    National Institute of Health and Care Excellence

37     OPDW- Outpatient Dataset for Wales (secondary care outpatient appointment dataset)

38     PEDW- Patient Episode Dataset for Wales (hospital admission dataset)

39     QOF-    Quality and Outcomes Framework

40     SAIL -    Secure Anonymised Information Linkage

41     SMI-    Serious Mental Illness

42     WLGP- Welsh Longitudinal General Practice (dataset)

43

## Abstract

**Background:** The use of antipsychotics in primary care is increasing, and more are being used for non-psychotic illnesses. Long-term use of antipsychotics confers increased risk of cardiometabolic disease, so ongoing need should be reviewed regularly by psychiatrists. This study explored changes over time in antipsychotic management and prescribing in primary care, and proportions of patients ( $\geq 18$  years) prescribed antipsychotics receiving psychiatrist review.

**Methods and Findings:** This was a retrospective, population-based observational study using data from the Secure Anonymised Information Linkage databank of approximately 3 million people in Wales (2011 to 2020). Outcomes were prevalence of patients who had received  $\geq 6$  antipsychotic prescriptions per year, proportion of patients prescribed antipsychotics who had received psychiatrist review in the preceding 12 months, and proportion of patients prescribed antipsychotics who were registered on the UK Primary Care Serious Mental Illness, Depression and/or Dementia registers, or were not on these registers. The prevalence of adults prescribed antipsychotics increased from 1.06% (95%CI 1.04 to 1.07%) in 2011 to 1.45% (95%CI 1.43 to 1.46%) in 2020; 1 in 69 adults were prescribed antipsychotics in 2020. The proportion of adults taking antipsychotics solely managed by primary care increased from 40% (95%CI 39 to 41%) in 2011 to 48% (95%CI 47 to 49%) by 2020. The proportion of antipsychotics prescribed to patients not on the Serious Mental Illness register increased from 50% (95%CI 49 to 51%) in 2011 to 56% (95%CI 56 to 57%) by 2020, meaning many patients may not be monitored for the cardiometabolic risk from antipsychotics.

66     **Conclusions:** Antipsychotic prescribing is increasing. More people are solely managed by  
67     general practitioners without psychiatrist review and are not on relevant disease registers,  
68     so are less likely to undergo vital cardiometabolic monitoring. These trends pose risks for  
69     patients and need to be addressed urgently.

## Introduction

Antipsychotic medication (APM) is licenced in the United Kingdom (UK) for the management of serious mental illness (SMI) such as schizophrenia and bipolar disorder [1]. Some atypical APMs have extended U.K. licences for treatment of depression (quetiapine) and short-term behavioural management in dementia (risperidone) [2]. APMs are increasingly prescribed off-licence by psychiatrists, often long-term for the management of other conditions, including personality disorder [3], behavioural management in learning disability [4], autism[5] and anxiety [6], despite this contravening best practice guidelines issued by the U.K. National Institute of Health and Care Excellence (NICE) [3, 7, 8]. APMs are effective medications for SMI, but increase risk of obesity [9], type-2 diabetes mellitus [10] and cardiovascular disease [11] when used long-term [12]. Specialist psychiatric review of APM should be undertaken regularly to prevent inappropriate overuse, given patients with SMI die 15-20 years earlier, mainly due to increased rates of cardiovascular disease [13-15], of which APM use is an independent risk factor [16, 17].

General practitioners (GPs) in the U.K. mainly provide physical health reviews of patients with psychotic illness taking APMs [13, 18]. These are conducted via annual recall of patients with diagnostic codes that include them on the U.K. Quality Outcomes Framework (QOF) primary care serious mental illness (QOF SMI) register (which is termed a 'mental health' register but focusses entirely on patients with psychotic illnesses and those prescribed lithium). QOF is a national performance management and funding mechanism to establish disease registers of patients who require additional monitoring and support due to existing chronic disease, and forms part of the GP primary care contract in the UK (now excluding Scotland) [19] (see Table S1). The QOF SMI annual review includes monitoring of alcohol

consumption, smoking, body mass index, blood pressure, blood glucose and lipids, to detect patients with SMI at risk of developing cardiometabolic diseases [13]. However, patients taking APM for dementia, depression and conditions such as anxiety or personality disorder are not captured on the QOF SMI register, and so risk being missed for cardiometabolic monitoring: a cohort study of 47,724 patients in 2016 reported that <50% patients taking APM are using these for a psychotic diagnosis and thus may miss monitoring [7]. GPs report they lack the skills needed to manage APM independently (e.g., alter dose, switch, or stop APM) that is normally provided by psychiatrists who have the expertise to undertake this review [18, 20, 21]. Patients who are initiated on APM by psychiatrists are often then discharged and followed up by primary care; a cohort study estimated that 31% of patients with SMI were managed solely by primary care in 2009 [22]. These patients may take APM long-term with no opportunity for regular psychiatric review. This study aims to answer the following questions:

1. Has the prevalence of long-term APM use in primary care changed over the decade just before the COVID-19 pandemic?
2. Has the proportion of patients prescribed long-term APM receiving specialist psychiatric review changed over this period?
3. Are there differences in the proportion of people prescribed APMs that are included on QOF SMI, depression, and dementia registers in 2020 compared to 2011?

## Methods

### *Study design*

This is a longitudinal, retrospective observational study, undertaken with reference to the ‘Strengthening the Reporting of Observational Studies in Epidemiology’ (STROBE) guidelines [23].

### *Study population and setting*

Individuals registered with a GP practice providing data to the Secure Anonymised Information Linkage (SAIL) databank formed the population. Analysis focused on adult use ( $\geq 18$  years), broken down by main psychiatric speciality: general adult psychiatry (patients aged 18-64 years) and older adult psychiatry (patients aged  $\geq 65$  years). The prevalence of long-term APM use was defined by identifying patients who had APM prescriptions issued on  $\geq 6$  separate days in each calendar year. For each individual, their status on the annual date of 1<sup>st</sup> January was used to determine age (calculated using their week of birth).

We defined psychiatrist review as occurring where there is a record of a psychiatrist clinic contact with a registered medical practitioner or advanced nurse practitioner (including general adult-, older adult-, child and adolescent-, forensic- or learning disability psychiatry, and psychotherapy subspecialties), or psychiatric hospital admission in the 12 months preceding the year of long-term APM use. If neither outpatient contact nor hospital admission occurred, then we defined APM management as being solely provided by GPs. So, for example, an individual who on 1<sup>st</sup> January 2019 had  $\geq 6$  calendar events of APM issue, was counted as a denominator case, and if in the 12 months preceding this date, they had

either psychiatric hospital admission or outpatient contact, they would be counted as a numerator case. Two health boards of the seven in Wales did not provide complete psychiatric outpatient clinic returns for the entire study period; therefore, analysis of the proportions of patients prescribed APM who had received psychiatrist review was limited to the five health boards providing complete returns for 2011-2020. The COVID-19 pandemic resulted in the suspension of many hospital outpatient clinic services, hence we focused on APM management between 1/1/2011 and 1/1/2020.

#### *Data sources*

The SAIL databank was used in this study. This is an expanding data repository of 500 million anonymised and encrypted individual-level records from primary and secondary health care sources, and sociodemographic data relevant to health and well-being. This includes national datasets covering the whole of Wales (approximately 3 million population) [24-28]. Patients registered with GP practices providing data to SAIL were examined using the Welsh Longitudinal General Practice (WLGP) dataset. Currently (2024), 86% of Welsh general practices provide data to SAIL, covering 83% of the Welsh population. Attendance at outpatient psychiatric clinic was determined from the Outpatient Dataset for Wales (OPDW). Admission to psychiatric hospital was ascertained using the Patient Episode Dataset for Wales (PEDW). SAIL databank has been validated for use in studies on SMI in earlier studies [15].

Relevant diagnoses for inclusion in QOF SMI, depression and dementia registers recorded in GP records and prescriptions for APMs (with a licence for use in the UK in the study period as listed in the British National Formulary [2]) were extracted using 5-digit Read Codes (v2) in WLGP (see repository for all relevant coding algorithms: <https://github.com/alanwoodall/AMP-Epidemiology>). Discussion with two independent consultant psychiatrists from general adult and old-age psychiatry subspecialties confirmed that two APMs were rarely prescribed for psychiatric purposes in the UK and are almost exclusively used for non-psychiatric purposes: prochlorperazine (antiemetic) and levomepromazine (palliative care); these were excluded from analysis of total APM use.

## *Analysis*

The primary outcome measure was the number of adults issued a prescription for an APM on  $\geq 6$  separate days in each calendar year. Further analysis was undertaken to determine variation in annual prevalence of APM prescribing, QOF disease register coding and main locus of care by psychiatric speciality cohort as age (categorised into those aged 18-64 years, and those aged  $\geq 65$  years) for most analyses, to mirror the conventional UK division of care between general adult- and old-age psychiatric subspecialties. The prevalence of the six most common APMs prescribed from primary care over the study period were determined. With regard to the number of people on APM receiving psychiatrist review, we undertook sensitivity analysis varying the period to capture psychiatric review occurrence. The number of patients who had a lifetime history of relevant psychiatric diagnostic codes that would cause inclusion on the QOF SMI, QOF dementia and/or QOF depression registers was determined, along with the number of patients on each disease register prescribed long-

term APM. These three psychiatric illness QOF registers cover diagnoses for the majority of potential licensed uses of APM in the United Kingdom [2]. The number of patients prescribed APM not on any of these three psychiatric QOF-registers was also determined. For each year, we determined the proportion of total APM use for patients included in these four register subsets.

### *Statistical analysis*

Statistical analysis was undertaken using StatsDirect (Version 4.0.1, [www.statsdirect.com](http://www.statsdirect.com)). The Clopper-Pearson method was used for confidence intervals of binomial proportions [29]. Differences between binomial proportions were evaluated using the Miettinen-Nurminen method [30]. Results are presented as the main effect with a 95% confidence interval. A 5% significance level was used to test specific, pre-defined comparisons.

### *Patient and public involvement*

Oversight of the study, data analysis and reporting were made with patient and public advisors who serve on advisory panels for research with the Mental Health Research for Innovation Centre (M-RIC). One author (PS) is a public advisor.

## Results

### *Changes in Prevalence of APM prescribing between 2011 and 2020*

Table 1 shows the prevalence of long-term APM exposure in the population in 2011 and 2020 (annual trends are shown in Figure S1). The number of adults  $\geq 18$  years exposed to APM increased from 1.06% to 1.45%. This increase is more marked in the 18-64 years population (0.92% in 2011 increasing to 1.46% in 2020). Of individual APMs, quetiapine was the most prescribed APM in this population (increasing from 0.27% in 2011 to 0.64% in 2020), accounting for 75% of the relative increase in APM exposure. For the  $\geq 65$  years population, the prevalence of APM exposure has fallen from 1.51% in 2011 to 1.42% in 2020. Risperidone is now the most prescribed APM in the  $\geq 65$  years population (increasing from 0.17% in 2011 to 0.36% in 2020). Table S2 shows the counts of patients (all ages) receiving long-term APM listed in the British National Formulary in 2011 and 2020, and their licensed indications. The proportion of total long-term APM exposure that is accounted for by 'second generation' or 'atypical' APMs increased from 79.7% in 2011 to 91.7% in 2020. Approximately 94% of total APM exposures in 2020 are accounted for by 6 individual APMs: quetiapine (37.3%), olanzapine (22.6%), risperidone (15.3%) aripiprazole (12.9%), amisulpride (3.6%) and haloperidol (2.5%).

|                                    | Year                       | All antipsychotics         |                            | Quetiapine                 |                            | Olanzapine                 |                            | Risperidone                |                            | Amisulpride                |                            | Aripiprazole               |                            | Haloperidol                 |                            |
|------------------------------------|----------------------------|----------------------------|----------------------------|----------------------------|----------------------------|----------------------------|----------------------------|----------------------------|----------------------------|----------------------------|----------------------------|----------------------------|----------------------------|-----------------------------|----------------------------|
|                                    |                            | 2011                       | 2020                       | 2011                       | 2020                       | 2011                       | 2020                       | 2011                       | 2020                       | 2011                       | 2020                       | 2011                       | 2020                       | 2011                        | 2020                       |
| All adults<br>(≥ 18 years)         | Counts, (r/n)              | 21,907/<br>2,076,839       | 31,946/<br>2,206,635       | 6,349/<br>2,076,839        | 12,328/<br>2,206,635       | 5,412/<br>2,076,839        | 7,520/<br>2,206,635        | 3,236/<br>2,076,839        | 5,020/<br>2,206,635        | 1,531/<br>2,076,839        | 1,190/<br>2,206,635        | 1,354/<br>2,076,839        | 4,263/<br>2,206,635        | 991/<br>2,076,839           | 825/<br>2,206,635          |
|                                    | Prevalence,<br>% (95% CI)  | 1.055<br>(1.041,<br>1.069) | 1.448<br>(1.432,<br>1.464) | 0.306<br>(0.298,<br>0.313) | 0.559<br>(0.549,<br>0.569) | 0.261<br>(0.254,<br>0.268) | 0.341<br>(0.333,<br>0.348) | 0.156<br>(0.150,<br>0.161) | 0.227<br>(0.221,<br>0.234) | 0.074<br>(0.070,<br>0.078) | 0.054<br>(0.051,<br>0.057) | 0.065<br>(0.062,<br>0.069) | 0.193<br>(0.187,<br>0.199) | 0.044<br>(0.041,<br>0.047)  | 0.038<br>(0.035,<br>0.040) |
|                                    | Difference,<br>%, (95% CI) | +0.393<br>(+0.372, +0.414) |                            | +0.253<br>(+0.241, +0.266) |                            | +0.080<br>(+0.070, +0.091) |                            | +0.071<br>(+0.063, +0.080) |                            | -0.020<br>(-0.025, -0.015) |                            | +0.128<br>(+0.121, +0.135) |                            | -0.007<br>(-0.014, -0.006,) |                            |
| General<br>Adults<br>(18-64 years) | Counts, (r/n)              | 14,781/<br>1,605,559       | 23,838/<br>1,634,511       | 4,290/<br>1,605,559        | 10,453/<br>1,634,511       | 4,237/<br>1,605,559        | 5,509/<br>1,634,511        | 2,457/<br>1,605,559        | 2,938/<br>1,634,511        | 800/<br>1,605,559          | 809/<br>1,634,511          | 1,097/<br>1,605,559        | 3,398/<br>1,634,511        | 535/<br>1,605,559           | 534/<br>1,634,511          |
|                                    | Prevalence,<br>% (95% CI)  | 0.921<br>(0.906,<br>0.936) | 1.458<br>(1.444,<br>1.477) | 0.267<br>(0.259,<br>0.275) | 0.640<br>(0.627,<br>0.652) | 0.264<br>(0.256,<br>0.272) | 0.337<br>(0.328,<br>0.346) | 0.153<br>(0.147,<br>0.159) | 0.180<br>(0.173,<br>0.186) | 0.050<br>(0.047,<br>0.053) | 0.050<br>(0.046,<br>0.053) | 0.068<br>(0.064,<br>0.072) | 0.204<br>(0.197,<br>0.211) | 0.033<br>(0.031,<br>0.036)  | 0.033<br>(0.030,<br>0.036) |
|                                    | Difference,<br>%, (95% CI) | +0.537<br>(+0.514, +0.561) |                            | +0.373<br>(+0.358, +0.387) |                            | +0.073<br>(+0.061, +0.085) |                            | +0.027<br>(+0.018, +0.036) |                            | 0.000<br>(-0.005, +0.005)  |                            | +0.136<br>(+0.131, +0.148) |                            | 0.000<br>(-0.000, +0.000)   |                            |
| Older Adults<br>(≥ 65 years)       | Counts, (r/n)              | 7,126/<br>471,280          | 8,108/<br>572,124          | 1,914/<br>471,280          | 1,876/<br>572,124          | 1,175/<br>471,280          | 2,011/<br>572,124          | 779/<br>471,280            | 2,082/<br>572,124          | 730/<br>471,280            | 381/<br>572,124            | 267/<br>471,280            | 875/<br>572,124            | 456/<br>471,280             | 291/<br>572,124            |
|                                    | Prevalence,<br>% (95% CI)  | 1.512<br>(1.477,<br>1.547) | 1.417<br>(1.387,<br>1.448) | 0.406<br>(0.388,<br>0.424) | 0.328<br>(0.313,<br>0.343) | 0.249<br>(0.236,<br>0.264) | 0.352<br>(0.337,<br>0.367) | 0.165<br>(0.154,<br>0.177) | 0.364<br>(0.348,<br>0.380) | 0.155<br>(0.144,<br>0.167) | 0.067<br>(0.060,<br>0.073) | 0.057<br>(0.050,<br>0.064) | 0.153<br>(0.143,<br>0.163) | 0.097<br>(0.088,<br>0.111)  | 0.051<br>(0.045,<br>0.057) |
|                                    | Difference,<br>%, (95% CI) | -0.095<br>(-0.141, -0.049) |                            | -0.078<br>(-0.101, -0.055) |                            | +0.103<br>(+0.081, +0.124) |                            | +0.199<br>(+0.178, 0.219)  |                            | -0.088<br>(-0.101, -0.076) |                            | +0.096<br>(+0.835, +0.109) |                            | -0.046<br>(-0.056, -0.037)  |                            |

**Table 1: APM prevalence changes between 2011 and 2020.** Analysis based on number of patients prescribed regular APM, (r), as a proportion of the at-risk population in a calendar year, (n).

221 *Proportion of patients prescribed APM receiving psychiatric specialist review.*

222 The percentage of adult patients taking APM who received specialist psychiatric review in  
 223 the 12 months preceding each year (2011-2020) fell from 59.6% to 52.0%; nearly half of all  
 224 adults prescribed APM were not receiving annual psychiatrist review (Table 2; annual trends  
 225 are shown in Figure S2). When analysed by psychiatric subspecialty, the proportion of 18–64  
 226 year old patients taking regular APM between 2011-2020 that received psychiatrist review in  
 227 the previous year fell from 65.7% to 55.0%. The greatest decrease in psychiatrist review  
 228 occurred in patients prescribed quetiapine (-17.0%). For the ≥65 years population, less than  
 229 half of patients underwent specialist psychiatric review, decreasing from 47.5% in 2011 to  
 230 43.4% in 2020. The greatest decrease was seen for those taking amisulpride (-18.2%).

|                                       |                                                   | All antipsychotics  |                     | Quetiapine           |                     | Olanzapine          |                     | Risperidone         |                     | Amisulpride          |                     | Aripiprazole         |                     | Haloperidol         |                     |
|---------------------------------------|---------------------------------------------------|---------------------|---------------------|----------------------|---------------------|---------------------|---------------------|---------------------|---------------------|----------------------|---------------------|----------------------|---------------------|---------------------|---------------------|
|                                       | Year                                              | 2011                | 2020                | 2011                 | 2020                | 2011                | 2020                | 2011                | 2020                | 2011                 | 2020                | 2011                 | 2020                | 2011                | 2020                |
| Adults<br>(≥18<br>years)              | Patients reviewed<br>by psychiatrist,<br>r/n      | 9,574/<br>16,053    | 11,894/<br>22,855   | 2,978/<br>4,786      | 4,539/<br>8,940     | 2,362/<br>3,698     | 2,736/<br>5,272     | 1,428/<br>2,466     | 1,750/<br>3,607     | 751/<br>1,146        | 504/<br>919         | 787/<br>974          | 2,102/<br>3,191     | 390/<br>813         | 311/<br>593         |
|                                       | Patients reviewed<br>by psychiatrist, %, (95% CI) | 59.6<br>(58.9-60.4) | 52.0<br>(51.4-52.7) | 62.2<br>(60.8-63.6)  | 50.8<br>(49.7-51.8) | 63.9<br>(62.3-65.4) | 51.9<br>(50.6-53.2) | 57.9<br>(56.0-59.8) | 48.5<br>(46.9-50.2) | 65.5<br>(62.7-68.2)  | 54.8<br>(51.6-58.0) | 80.8<br>(78.2-83.2)  | 65.9<br>(64.2-67.5) | 48.0<br>(44.6-51.4) | 52.5<br>(48.4-56.5) |
|                                       | Difference, %, (95% CI)                           | -7.6 (-8.6, -6.6)   |                     | -11.4 (-13.2, -9.7)  |                     | -12.0 (-14.0, -9.9) |                     | -9.4 (-12.0, -6.8)  |                     | -10.7 (-14.9, -6.5)  |                     | -14.9(-17.8, -11.9)  |                     | +4.5 (-0.8, +9.8)   |                     |
| General<br>Adults<br>(18-64<br>years) | Patients reviewed<br>by psychiatrist,<br>r/n      | 7,028/<br>10,691    | 9,358/<br>17,013    | 2,315/<br>3,339      | 3,945/<br>7,538     | 1,901/<br>2,900     | 2,104/<br>3,882     | 1,124/<br>1,903     | 1,110/<br>2,141     | 432/<br>585          | 384/<br>609         | 679/<br>818          | 1,775/<br>2,593     | 263/<br>431         | 223/<br>357         |
|                                       | Patients reviewed<br>by psychiatrist, %, (95% CI) | 65.7<br>(64.8-66.6) | 55.0<br>(54.3-55.8) | 69.3<br>(67.8-70.9)  | 52.3<br>(51.2-53.5) | 65.6<br>(63.8-67.3) | 54.2<br>(52.6-55.8) | 59.1<br>(56.9-61.3) | 51.8<br>(49.7-54.0) | 73.8<br>(70.3-77.4)  | 63.1<br>(59.2-66.9) | 83.0<br>(80.4-85.6)  | 68.5<br>(66.7-70.2) | 61.0<br>(56.4-65.6) | 62.5<br>(57.4-67.5) |
|                                       | Difference, %, (95% CI)                           | -10.7 (-11.7, -9.5) |                     | -17.0 (-19.0, -15.0) |                     | -11.4 (-13.7, -9.0) |                     | -7.3 (-10.3, -4.2)  |                     | -10.7 (-16.1, -5.5)  |                     | -14.5 (-18.1, -11.0) |                     | +1.5 (-8.3, +5.4)   |                     |
|                                       | Patients reviewed<br>by psychiatrist,<br>r/n      | 2,546/<br>5,362     | 2,536/<br>5,842     | 663/<br>1,447        | 594/<br>1,402       | 461/<br>798         | 632/<br>1,370       | 304/<br>563         | 640/<br>1,466       | 319/<br>561          | 120/<br>310         | 108/<br>156          | 327/<br>598         | 127/<br>382         | 88/<br>236          |
| Older<br>Adults<br>(≥65<br>years)     | Patients reviewed<br>by psychiatrist, %, (95% CI) | 47.5<br>(46.1-48.8) | 43.4<br>(42.1-44.7) | 45.8<br>(43.3-48.4)  | 42.4<br>(39.8-45.0) | 57.8<br>(54.3-61.2) | 46.1<br>(43.5-48.8) | 54.0<br>(49.9-58.1) | 43.7<br>(41.1-46.2) | 56.9<br>(52.8-61.0)  | 38.7<br>(33.3-44.1) | 69.2<br>(62.0-76.5)  | 54.7<br>(50.7-58.7) | 33.2<br>(28.5-38.0) | 37.3<br>(31.1-43.5) |
|                                       | Difference, %, (95% CI)                           | -4.1 (-5.9, -2.2)   |                     | -3.4 (-7.1, +2.0)    |                     | -11.7 (-16.0, -7.3) |                     | -10.3 (-15.2, -5.5) |                     | -18.2 (-25.1, -11.2) |                     | -14.5 (-23.3, -5.8)  |                     | +4.1 (-11.8, +3.7)  |                     |

232

233 **Table 2: Proportion of patients taking regular APM who have had a specialist psychiatrist review in previous 12 months.** Analysis based on

234 number of patients prescribed APM who had received psychiatrist review, (r), as a proportion of the number of patients prescribed APM in that

235 calendar year, (n).

236

237 We conducted a sensitivity analysis of psychiatric follow up by varying the period of time  
 238 allowed between 1 week and up to 5 years prior to 1/1/2020 to confirm data patterns  
 239 (Figure S3). Of those aged 18-64 years prescribed long-term APM in 2020, 22.9% had no  
 240 psychiatrist review in the previous 5 years There was variability based on individual APM;  
 241 those most likely to have had psychiatric review were prescribed aripiprazole (88.5%), while  
 242 those least likely were prescribed risperidone (70.9%). For those aged >65 years, 29.9% of  
 243 those taking APM long-term in 2020 had no evidence of psychiatrist review in the previous 5  
 244 years. Again, there was variability based on individual APM: those most likely to have had a  
 245 review were prescribed aripiprazole (84.4%), while those least likely were prescribed  
 246 haloperidol (61.9%).

247

248 *Proportions of patients on the psychiatric QOF registers prescribed long-term APM.*

249 In 2020, nearly 1 in 63 (1.59%) adults  $\geq 18$  years had a lifetime diagnostic code that triggered  
 250 inclusion on the QOF SMI register, (+0.17% since 2011); 1 in 5 adults (20.7%) had a lifetime  
 251 diagnostic code that triggered inclusion on the QOF depression register (+5.6% since 2011); 1  
 252 in 130 adults (0.77%) had a lifetime diagnostic code that triggered inclusion on the QOF  
 253 dementia register (+ 0.1% since 2011) ( Table 3). For adults not on these three psychiatric  
 254 illness QOF registers, the proportion fell from 83.7% in 2011, to 78.1% in 2020.

255

| QOF Registers          | Year                  | 2011                     | 2020                     |
|------------------------|-----------------------|--------------------------|--------------------------|
| Serious Mental Illness | Counts (r/n)          | 29,487 /<br>2,076,839    | 35,105 /<br>2,206,635    |
|                        | Prevalence (95% CI) % | 1.42 (1.40, 1.44)        | 1.59 (1.57, 1.61)        |
|                        | Difference (95%CI) %  | +0.17 (+0.15, +0.19)     |                          |
| Depression             | Counts (r/n)          | 313,156 /<br>2,076,839   | 457,709 /<br>2,206,635   |
|                        | Prevalence (95% CI) % | 15.1 (15.0, 15.1)        | 20.7 (20.7, 20.8)        |
|                        | Difference (95%CI) %  | +5.6 (+5.6, +5.7)        |                          |
| Dementia               | Counts (r/n)          | 14,028 /<br>2,076,839    | 16,902 /<br>2,206,635    |
|                        | Prevalence (95% CI) % | 0.68 (0.66, 0.69)        | 0.77 (0.76, 0.78)        |
|                        | Difference (95%CI) %  | +0.09 (+0.07, +0.11)     |                          |
| None of the above      | Counts (r/n)          | 1,739,328 /<br>2,076,839 | 1,722,532 /<br>2,206,635 |
|                        | Prevalence (95% CI) % | 83.8 (83.7, 83.8)        | 78.1 (78.0, 78.1)        |
|                        | Difference (95%CI) %  | -5.7 (-5.8, -5.6)        |                          |

256

257 **Table 3: Quality and Outcomes Framework registration prevalence changes for persons**

258 **aged ≥18 years between 2011 and 2020.** Analysis is based on the number of patients (r)

259 who have ever been the relevant register, as a proportion of the at-risk population (n) in the

260 calendar year.

261

262 Table 4 shows the proportion of adults (≥18 years) prescribed long-term APM listed in the

263 different QOF register categories (annual trends are shown in Figure S4). For patients on the

264 QOF SMI register, the proportion prescribed APM increased to 39.6% in 2020 (+2.6% since

265 2011), with olanzapine being the most common exposure in 2020 (11.9%; +0.08% since

266 2011). For those on the QOF dementia register, the proportion prescribed APM decreased

267 significantly from 16.7% in 2011 to 12.9% in 2020. Risperidone was the most common APM

268 exposure in this group in 2020 (5.45%; +3.85% since 2011). For those on the QOF depression

269 register, the proportion prescribed APM increased from 3.37% in 2011 to 4.12% by 2020; the

270 most common APM exposure in this group in 2020 was to quetiapine (1.91%; +0.78% since

271 2011). For patients not on any of these three QOF psychiatric illness registers, the proportion  
 272 prescribed APM increased from 0.26% in 2011 to 0.36% in 2020;. the most common APM  
 273 exposure in this group in 2020 was to quetiapine (0.13%, +0.06% since 2011).

| Proportion of patients on QOF registers prescribed APM | Registers              |                      | All antipsychotics      |                         | Quetiapine               |                         | Olanzapine              |                         | Risperidone             |                         | Amisulpride             |                         | Aripiprazole            |                         | Haloperidol              |                         |
|--------------------------------------------------------|------------------------|----------------------|-------------------------|-------------------------|--------------------------|-------------------------|-------------------------|-------------------------|-------------------------|-------------------------|-------------------------|-------------------------|-------------------------|-------------------------|--------------------------|-------------------------|
|                                                        |                        | Year                 | 2011                    | 2020                    | 2011                     | 2020                    | 2011                    | 2020                    | 2011                    | 2020                    | 2011                    | 2020                    | 2011                    | 2020                    | 2011                     | 2020                    |
|                                                        | Serious Mental Illness | Counts (r/n)         | 10,960/<br>29,487       | 13,915/<br>35,105       | 2,614/<br>29,487         | 4,024/<br>35,105        | 3,498/<br>29,487        | 4,180/<br>35,105        | 1,680/<br>29,487        | 1,771/<br>35,105        | 846/<br>29,487          | 846/<br>35,105          | 974/<br>29,487          | 2,549/<br>35,105        | 423/<br>29,487           | 448/<br>35,105          |
|                                                        |                        | Proportion (95% CI)% | 37.17<br>(36.62, 37.72) | 39.74<br>(39.23, 40.25) | 8.87<br>(8.54, 9.19)     | 11.49<br>(11.16, 11.83) | 11.86<br>(11.49, 12.23) | 11.94<br>(11.60, 12.28) | 5.70<br>(5.43, 5.96)    | 5.06<br>(4.83, 5.29)    | 2.87<br>(2.68, 3.06)    | 2.42<br>(2.26, 2.58)    | 3.30<br>(3.10, 3.51)    | 7.28<br>(7.01, 7.55)    | 1.44<br>(1.30, 1.57)     | 1.28<br>(1.16, 1.40)    |
|                                                        |                        | Difference (95%CI)%  | +2.57 (+1.72, +3.22)    |                         | +2.62 (+2.13, +3.07)     |                         | +0.08 (-0.46, +0.55)    |                         | -0.64 (-1.17, -0.48)    |                         | -0.45 (-0.71, -0.21)    |                         | +3.98 (+3.61, +4.31)    |                         | -0.16 (-0.34, +0.02)     |                         |
|                                                        | Depression             | Counts (r/n)         | 10,552/<br>313,156      | 18,852/<br>457,709      | 3,546/<br>313,156        | 8,754/<br>457,709       | 2,773/<br>313,156       | 4,371/<br>457,709       | 1,336/<br>313,156       | 2,028/<br>457,709       | 619/<br>313,156         | 559/<br>457,709         | 738/<br>313,156         | 2,529/<br>457,709       | 307/<br>313,156          | 329/<br>457,709         |
|                                                        |                        | Proportion (95% CI)% | 3.37<br>(3.31, 3.43)    | 4.12<br>(4.06, 4.18)    | 1.13<br>(1.10, 1.17)     | 1.91<br>(1.87, 1.95)    | 0.89<br>(0.85, 0.92)    | 0.96<br>(0.93, 0.98)    | 0.43<br>(0.41, 0.45)    | 0.44<br>(0.42, 0.46)    | 0.20<br>(0.18, 0.21)    | 0.12<br>(0.11, 0.13)    | 0.24<br>(0.22, 0.25)    | 0.55<br>(0.53, 0.57)    | 0.10<br>(0.09, 0.11)     | 0.07<br>(0.06, 0.08)    |
|                                                        |                        | Difference (95%CI)%  | +0.75 (+0.66, +0.83)    |                         | +0.78 (+0.72, +0.84)     |                         | +0.07 (+0.03, +0.11)    |                         | +0.01 (-0.01, +0.05)    |                         | -0.08 (-0.09, -0.06)    |                         | +0.31 (+0.29, +0.35)    |                         | -0.03 (-0.04, -0.01)     |                         |
|                                                        | Dementia               | Counts (r/n)         | 2,344/<br>14,028        | 2,174/<br>16,902        | 951/<br>14,028           | 430/<br>16,902          | 165/<br>14,028          | 326/<br>16,902          | 210/<br>14,028          | 904/<br>16,902          | 304/<br>14,028          | 100/<br>16,902          | 70/<br>14,028           | 209/<br>16,902          | 161/<br>14,028           | 72/<br>16,902           |
|                                                        |                        | Proportion (95% CI)% | 16.71<br>(16.10, 17.34) | 12.86<br>(12.37, 13.38) | 6.78<br>(6.36, 7.20)     | 2.54<br>(2.32, 2.79)    | 1.18<br>(1.01, 1.37)    | 1.93<br>(1.73, 2.15)    | 1.50<br>(1.30, 1.70)    | 5.35<br>(5.02, 5.70)    | 2.17<br>(1.94, 2.42)    | 0.59<br>(0.48, 0.71)    | 0.50<br>(0.40, 0.63)    | 1.24<br>(1.07, 1.40)    | 1.15<br>(0.98, 1.34)     | 0.43<br>(0.33, 0.52)    |
|                                                        |                        | Difference (95%CI)%  | -3.85 (-4.64, -3.06)    |                         | -4.24 (-4.70, -3.77)     |                         | +0.75 (+0.47, +1.03)    |                         | +3.85 (+3.43, +4.27)    |                         | -1.58 (-1.83, -1.32)    |                         | +0.74 (+0.53, +0.95)    |                         | -0.72 (-0.92, -0.53)     |                         |
|                                                        | None of the above      | Counts (r/n)         | 4,441/<br>1,739,328     | 6,147/<br>1,722,532     | 1,206/<br>1,739,328      | 2,170/<br>1,722,532     | 750/<br>1,739,328       | 1,120/<br>1,722,532     | 872/<br>1,739,328       | 1,585/<br>1,722,532     | 245/<br>1,739,328       | 149/<br>1,722,532       | 144/<br>1,739,328       | 611/<br>1,722,532       | 315/<br>1,739,328        | 205/<br>1,722,532       |
|                                                        |                        | Proportion (95% CI)% | 0.255<br>(0.248, 0.263) | 0.357<br>(0.348, 0.366) | 0.069<br>(0.065, 0.0730) | 0.126<br>(0.12, 0.13)   | 0.043<br>(0.040, 0.046) | 0.065<br>(0.061, 0.069) | 0.050<br>(0.047, 0.054) | 0.092<br>(0.088, 0.097) | 0.014<br>(0.012, 0.016) | 0.009<br>(0.007, 0.010) | 0.008<br>(0.007, 0.010) | 0.036<br>(0.033, 0.038) | 0.018<br>(0.016, 0.0200) | 0.012<br>(0.010, 0.014) |
|                                                        |                        | Difference (95%CI)%  | +0.102 (+0.090, +0.011) |                         | +0.057 (+0.051, +0.063)  |                         | +0.022 (+0.017, +0.027) |                         | +0.042 (+0.036, +0.048) |                         | -0.005 (-0.008, -0.003) |                         | +0.028 (+0.024, 0.030)  |                         | -0.006 (-0.009, -0.004)  |                         |

275

276 **Table 4: Changes in APM use in adult patients (≥18 years) with a lifetime code on the QOF Serious Mental Illness, depression and/or**

277 **dementia registers, and those who are not on any of these three psychiatric illness QOF registers, between 2011 and 2020.** The number of

278 patients with a lifetime code on the relevant QOF registers exposed to APM, (r ), is expressed as a proportion of the total population with a

279 lifetime code for inclusion on each QOF register, (n).

280

281 *Proportion of overall long-term APM use by QOF register status*

282 Table 5 shows the proportion of overall long-term APM use for patients who are registered  
 283 on the QOF SMI, QOF dementia, and/or QOF depression registers, and the proportion of  
 284 overall long-term APM use for patients not on any of these three QOF psychiatric illness  
 285 registers (annual trends are shown in Figure S5). The proportion of overall APM use  
 286 prescribed for patients on the QOF SMI register fell from 50.0% in 2011 to 43.6% by 2020;  
 287 the lowest proportion was quetiapine (32% in 2020). The proportion of overall APM use for  
 288 patients on the QOF dementia register fell from 10.7% in 2011 to 6.8% in 2020;; nearly 18%  
 289 of all long-term risperidone use is for patients on the QOF dementia register. The proportion  
 290 of APM use prescribed to patients who are registered on the QOF depression register  
 291 increased from 48.2% in 2011 to 59.0% by 2020; For quetiapine, 71% of total use in 2020  
 292 was for patients who have been on the QOF depression register during their life, a 15%  
 293 increase from 2011 to 2020. The proportion of APM prescribed for patients not on these  
 294 three registers fell slightly (20.2% in 2011 to 19.2% in 2020). The proportion of haloperidol  
 295 use was greatest for this group (34.6% in 2011, decreasing to 24.9% in 2020).

|                                                 | QOF Registers          | Year                  | All antipsychotics      |                         | Quetiapine              |                         | Olanzapine              |                         | Risperidone             |                         | Amisulpride             |                         | Aripiprazole            |                         | Haloperidol             |                         |
|-------------------------------------------------|------------------------|-----------------------|-------------------------|-------------------------|-------------------------|-------------------------|-------------------------|-------------------------|-------------------------|-------------------------|-------------------------|-------------------------|-------------------------|-------------------------|-------------------------|-------------------------|
|                                                 |                        |                       | 2011                    | 2020                    | 2011                    | 2020                    | 2011                    | 2020                    | 2011                    | 2020                    | 2011                    | 2020                    | 2011                    | 2020                    | 2011                    | 2020                    |
| Proportion of total APM prescribing by register | Serious Mental Illness | Counts (r/n)          | 10,960/<br>21,907       | 13,915/<br>31,946       | 2,614/<br>6,349         | 4,024/<br>12,328        | 3,498/<br>5,412         | 4,180/<br>7,520         | 1,680/<br>3,236         | 1,771/<br>5,020         | 846/<br>1,530           | 846/<br>1,190           | 974/<br>1,354           | 2,549/<br>4,263         | 423/<br>911             | 448/<br>825             |
|                                                 |                        | Prevalence (95% CI) % | 50.03<br>(49.37, 50.69) | 43.56<br>(43.01, 44.10) | 41.17<br>(39.97, 42.39) | 32.64<br>(31.82, 33.47) | 64.63<br>(63.35, 65.90) | 55.59<br>(54.46, 56.71) | 51.92<br>(50.19, 53.63) | 35.28<br>(33.97, 36.61) | 55.29<br>(52.79, 57.77) | 71.09<br>(68.45, 73.67) | 71.94<br>(69.48, 74.33) | 59.79<br>(58.31, 61.27) | 46.43<br>(43.22, 49.68) | 54.30<br>(50.89, 57.67) |
|                                                 |                        | Difference (95%CI) %  | -6.47 (-7.33, -5.61)    |                         | -8.53 (-9.98, -7.08)    |                         | -9.04 (-10.77, -7.33)   |                         | -16.64 (-18.82, -14.46) |                         | +15.80 (+12.12, +19.47) |                         | -12.15 (-15.10, -9.18)  |                         | +7.87 (+3.16, +12.58)   |                         |
|                                                 | Depression             | Counts (r/n)          | 10,552/<br>21,907       | 18,852/<br>31,946       | 3,546/<br>6,349         | 8,754/<br>12,328        | 2,773/<br>5,412         | 4,371/<br>7,520         | 1,336/<br>3,236         | 2,028/<br>5,020         | 619/<br>1,530           | 559/<br>1,190           | 738/<br>1,354           | 2,529/<br>4,263         | 307/<br>911             | 329/<br>825             |
|                                                 |                        | Prevalence (95% CI) % | 48.17<br>(47.51, 48.83) | 59.01<br>(58.47, 59.55) | 55.85<br>(54.63, 57.07) | 71.01<br>(70.21, 71.80) | 51.24<br>(49.91, 52.57) | 58.18<br>(57.01, 59.24) | 41.29<br>(39.59, 42.98) | 40.40<br>(39.05, 41.76) | 40.46<br>(38.00, 42.92) | 46.97<br>(44.15, 49.82) | 54.51<br>(51.84, 57.16) | 59.32<br>(57.85, 60.80) | 33.70<br>(30.70, 36.83) | 39.98<br>(36.59, 43.26) |
|                                                 |                        | Difference (95%CI) %  | +10.84 (+9.99, +11.70)  |                         | +15.16 (+13.72, +16.59) |                         | +6.94 (+5.15, +8.63)    |                         | -0.89 (-3.06, +1.28)    |                         | +6.51 (+2.76, +10.27)   |                         | +4.81 (+1.80, +7.84)    |                         | +6.28 (+1.64, +10.72)   |                         |
|                                                 | Dementia               | Counts (r/n)          | 2,344/<br>21,907        | 2,174/<br>31,946        | 951/<br>6,349           | 430/<br>12,328          | 165/<br>5,412           | 326/<br>7,520           | 210/<br>3,236           | 904/<br>5,020           | 304/<br>1,530           | 100/<br>1,190           | 70/<br>1,354            | 209/<br>4,263           | 161/<br>911             | 72/<br>825              |
|                                                 |                        | Prevalence (95% CI) % | 10.70<br>(10.29, 11.11) | 6.81<br>(6.53, 7.09)    | 14.98<br>(14.11, 15.88) | 3.49<br>(3.18, 3.83)    | 3.05<br>(2.62, 3.54)    | 4.34<br>(3.90, 4.82)    | 6.49<br>(5.69, 7.39)    | 18.01<br>(16.97, 19.07) | 19.87<br>(17.95, 21.94) | 8.40<br>(6.96, 10.13)   | 5.17<br>(4.11, 6.48)    | 4.90<br>(4.29, 5.59)    | 17.67<br>(15.33, 20.28) | 8.73<br>(7.00, 10.85)   |
|                                                 |                        | Difference (95%CI) %  | -3.89 (-4.37, -3.42)    |                         | -11.49 (-12.28, -10.70) |                         | +1.29 (+0.60, +1.94)    |                         | +11.52 (+10.01, +13.03) |                         | -11.47 (-14.16, -8.77)  |                         | -0.27 (-1.60, +1.06)    |                         | -8.94 (-12.16, -5.73)   |                         |
|                                                 | None of the above      | Counts (r/n)          | 4,441/<br>21,907        | 6,147/<br>31,946        | 1,206/<br>6,349         | 2,170/<br>12,328        | 750/<br>5,412           | 1,120/<br>7,520         | 872/<br>3,236           | 1,585/<br>5,020         | 245/<br>1,530           | 149/<br>1,190           | 144/<br>1,354           | 611/<br>4,263           | 315/<br>911             | 205/<br>825             |
|                                                 |                        | Prevalence (95% CI) % | 20.27<br>(19.74, 20.81) | 19.24<br>(18.81, 19.67) | 19.00<br>(18.05, 19.98) | 17.60<br>(16.94, 18.28) | 13.86<br>(12.96, 14.80) | 14.89<br>(14.11, 15.72) | 26.95<br>(25.42, 28.48) | 31.57<br>(30.29, 32.86) | 16.01<br>(14.26, 17.94) | 12.52<br>(10.76, 14.52) | 10.64<br>(9.10, 12.39)  | 14.33<br>(13.31, 15.42) | 34.58<br>(31.56, 37.72) | 24.85<br>(22.02, 27.91) |
|                                                 |                        | Difference (95%CI) %  | -1.03 (-1.71, -0.35)    |                         | -1.70 (-2.56, -0.23)    |                         | +1.03 (-0.19, +2.27)    |                         | +4.62 (+2.61, +6.65)    |                         | -3.49 (-6.16, -0.83)    |                         | +3.69 (+1.61, +5.78)    |                         | -9.73 (-14.05, -5.41)   |                         |

296

297 **Table 5: Changes in proportion of overall APM use in adult patients (≥18 years) with a lifetime code on the QOF Serious Mental Illness,**

298 **depression and/or dementia registers, and those who are not on any of these three psychiatric illness QOF registers, between 2011 and**

299 **2020.** The number of patients with a lifetime code on the relevant QOF registers exposed to APM, (r), is expressed as a proportion of the total

300 number of patients exposed to APM (n).

301

## Discussion

### *Principal findings*

Our study has shown that:

- (1) The prevalence of long-term APM use increased substantially in the adult population (approximately 1 in 69 adults aged  $\geq 18$  years were prescribed long-term APM by 2020), with rises most marked in the 18-64 years group (relative increase between 2011 and 2020 was 58%). There is a slight fall in the prevalence of APM use in the  $\geq 65$  years population (relative decrease between 2011 and 2020 is 6%).
- (2) For patients prescribed long-term APM, the proportion who had an annual review by a psychiatrist fell (relative decrease between 2011 and 2020 was 13%); nearly half of all adults did not have any annual psychiatric review in 2019-2020. This is more pronounced for the  $\geq 65$  years than the 18-64 years group.
- (3) The proportion of people prescribed long-term APM, who are not on the QOF SMI register increased from 50% in 2011 to 56% by 2020, so decreasing the likelihood of cardiometabolic monitoring and increasing the risk of experiencing adverse effects from APM in the adult population.

Our work suggests that APM are increasingly used for unlicensed and/or non-psychotic conditions. The decrease in psychiatric reviews of patients prescribed APM, along with increasing use for conditions that are not captured on the QOF SMI register and thus automatically subject to cardiometabolic monitoring, may combine to increase the risk of people becoming 'trapped' on APM in primary care, thus increasing their risk of cardiometabolic morbidity and premature mortality.

324

## 325 *Strengths and weaknesses of the study*

326 To our knowledge, this is the first assessment of APM management trends to report the  
 327 proportions of patients taking these medications who are managed solely in primary care,  
 328 and first to compare AMP prescribing patterns between different national QOF psychiatric  
 329 illness registers, and for licenced vs unlicensed use. This study has particular strengths: (1)  
 330 we focus only on patients who have had  $\geq 6$  prescription events annually, to identify patients  
 331 prescribed long-term APM who are most at risk of cardiometabolic disease. (2) SAIL is a large  
 332 databank with rich cross-referencing between primary and secondary care (inpatient and  
 333 outpatient contact) datasets for each patient, so identifying shared management trends by  
 334 primary care and psychiatric services. Limitations of this study include: (1) SAIL databank  
 335 obtains data exclusively from NHS Wales services, so caution should be applied when  
 336 generalising findings to other populations. (2) SAIL databank cannot provide number of  
 337 tablets issued per script, so quantification of APM burden is limited. (3) We only capture  
 338 APM exposure where the patient receives a prescription from NHS primary care and do not  
 339 capture where prescriptions are issued to patients privately, those registered with Armed  
 340 Forces or prison primary health care services, and those issued directly by secondary care  
 341 (which will include most intramuscular depot APM prescriptions); the oral APM clozapine is  
 342 also classified as high risk and licensed in the UK only for issue by psychiatrists so would not  
 343 be routinely captured [31]; these represent potential missing data in the population we are  
 344 not able to measure. (4) We have not identified patients being prescribed  $\geq 2$  APMs  
 345 concurrently. (5) With regards to psychiatrist review, our case definitions will not have  
 346 identified indirect patient management between GPs and psychiatrists (e.g. communication

without seeing the patient), nor will it have identified patient contact with non-prescribing mental health team members who may provide input into APM review (these are, however not able to make APM prescribing changes). (7) Use of lifetime prevalence of diagnostic codes to determine patient exposure to QOF SMI, QOF Dementia and QOF Depression registers, as other studies have done [7], will not detect changes in psychiatric diagnoses that can happen over time (e.g., a person may initially have a diagnosis of schizoaffective disorder (and so be recorded on the QOF SMI register) that is later revised to personality disorder (a diagnosis not captured on the QOF-SMI register, but the patient will still be counted on the QOF-SMI register due to lifetime coding). However, psychiatric codes are often inaccurate and not maintained regularly [32], or removed from GP records when an updated one is added (e.g. the above patient with personality disorder may still have a code of schizoaffective disorder which is not replaced with the new diagnostic code); up to 32% of psychiatric indications for APM use could not be clearly established in a recent study, which limits accuracy [33].

### *Comparison with other studies and need for future research*

We found a significant increase in adults exposed to long-term APM. The prevalences we report are consistent with other studies; Marston *et al* reported that 0.6-0.7% of the population had exposure to APM in their cohort study which ended in 2011 [7]; Shoham *et al* report an APM prevalence of 1.2% in 2014 in a questionnaire survey of those aged  $\geq 16$  years [34]. The greatest increase is for quetiapine, which accounted for 44% of all APM exposures in the 18-64 years group by 2020. Despite this increase in APM use, rates of psychiatric illness prevalence (as reported on the 3 psychiatric illness QOF registers) have not

increased proportionally in this population; this suggests increasing APM use is for non-psychotic disorders, such as anxiety, depression and personality disorder, as has been reported elsewhere [3, 7, 33]. Lack of access to appropriate psychological therapies is reported as driving increasing APM use in non-psychotic disorders [18]. Prevalence of long-term APM exposure in the  $\geq 65$  years population has decreased slightly, with significant falls in patients with dementia (-3.85% (95%CI: -4.64, -3.06)); this is promising, given the increased risk of mortality reported when APM are used long term in patients with Alzheimer's disease [35]. However, use of long-term risperidone in dementia patients has increased significantly (+3.85% (95%CI +3.43, +4.27)). The UK licence for risperidone is for *'short-term treatment (up to 6 weeks) of persistent aggression in patients with moderate to severe Alzheimer's dementia unresponsive to non-pharmacological interventions and when there is a risk of harm to self or others'* [2], and yet nearly 1 in 19 patients with dementia are prescribed risperidone long-term; studies report pressure on clinicians to use APM for patients with dementia in care homes, often as a result of shortages of staff trained in non-pharmacological interventions [18].

We found decreasing proportions of patients prescribed APM have had a psychiatric review in the preceding 12 months. One possible explanation may be more APM being prescribed independently by GPs; this study does not allow determination of which clinician initiated APM, but qualitative studies suggest that GPs are not confident to initiate APM without psychiatrist input [18, 21, 36], so we suspect this is unlikely. However, much of the rise in APM use in the 18-64 year group is due to quetiapine; one possibility is the use of low doses quetiapine for sedation instead of benzodiazepines [37] and/or as an adjunct to difficult-to-

treat depression by GPs and psychiatrists. Another possible explanation is that more patients are discharged on APM by psychiatrists to primary care, either when the patients with SMI are “stable” from a psychiatric perspective, or when APM are prescribed to patients who do not have psychotic illness, such as personality disorder, anxiety, or depression. This may be due to psychiatrists feeling they do not need to continue specialist input in the patient’s care, but many psychiatrists report pressure from managers to discharge all those patients who do not have SMI from their outpatient clinics [18]. Further research to determine APM initiation rates in primary care and management of APM for non-psychotic illness is required. [18, 21, 36]

While the prevalence of APM exposure is rising, the proportion of total APM use for patients with a psychotic illness history (inclusion on QOF SMI register) is decreasing; only 44% of APM use in 2020 was for patients with a history of SMI; this is similar to the proportion used for SMI (36%) reported by Marston *et al* [7]. This supports our concern that APM is being increasingly used long-term for non-psychotic disorders, often off-licence and in contravention of NICE guidelines (e.g. for personality disorder where APM should only be used short-term) [38].

Only the QOF SMI register funds GPs to undertake cardiometabolic monitoring of patients taking APM; 56% of patients prescribed long-term APM are not on this disease register, and GPs are not funded to undertake cardiometabolic monitoring for these patients. We suspect many GPs still perform unfunded cardiometabolic monitoring when APM are used in non-SMI conditions. However, with most cardiometabolic monitoring devolved to GP practices even when a patient remains under secondary care, there is a risk patients taking APM long-term may not have cardiometabolic monitoring undertaken, as primary care utilise

automated QOF SMI register recalls to facilitate this. A patient coded on the QOF SMI register will get annual recall for cardiometabolic monitoring and GP review, whereas patients taking APM who are coded only on the QOF dementia or QOF depression registers do not get automatic recall, as there is no QOF requirement to undertake cardiometabolic monitoring, so this is less likely to happen. For a patient prescribed long-term APM for personality disorders, anxiety, or autism, and thus who is not captured on any QOF psychiatric illness register, there is no funding or automatic recall for GP review, or for cardiometabolic monitoring. GPs are supposed to conduct annual medication reviews, but research shows that these are often incomplete, often of variable effectiveness, and limited action occurs particularly when APM is involved and there is no ongoing psychiatric input due to GP reluctant to change these medications [18, 21, 36, 39].

#### *Implications for clinicians and policymakers*

This study confirms that there is a rising burden of APM use in primary care in the UK, up to 2020. Fewer patients receive annual psychiatric review, as more are discharged to primary care for sole management. More APM is prescribed for off-licence and/or non-psychotic illness that are not captured on the QOF SMI register, meaning cardiometabolic monitoring and specialist review may not occur. There is an urgent need for appropriate resources to be provided so that patients taking APM long-term have access to an annual review with a psychiatrist able to optimise, switch or withdraw APM, and that primary care funding for cardiometabolic monitoring is based on the use of APM, rather than solely due to inclusion on the QOF-SMI register due to diagnosis. Without changes in the provision of such safeguards, there is a risk that increasing numbers of people will remain ‘trapped’ on APMs

439 long-term without effective psychiatrist review affording the opportunities to stop these  
440 medications, increasing their risk of developing cardiometabolic disease and contributing to  
441 premature mortality in patients with psychiatric illnesses.

442

*Contributors:* AW, IB, SS, LW and FSM conceived and designed the study. AW, IB, SS, LW and FSM obtained funding. AW, AG, and HC acquired and analysed the data. AW interpreted the data. AW drafted the initial manuscript. PS provided patient and public oversight. AW, FSM, LW, IB, SS, AG and PS critically revised the manuscript for important intellectual content. AW and IB did the statistical analyses. AW, AG, and HC had full access to all the data in the study. AW and IB take responsibility for the integrity of the data and the accuracy of the data analysis. They are the guarantors. The corresponding author attests that all listed authors meet authorship criteria and that no others meeting the criteria have been omitted.

*Funding:* AW is funded by a Heath and Care Wales Research Time Award (RTA-NHS-21-02)

*Ethical Approval:* The use of data from the SAIL databank was approved by the SAIL Information Governance Research Panel. As this study did not use person identifiable data no formal NHS research ethics committee approval was required. No data were reported where an output would have <5 individual counts.

*Dedication:* This work is dedicated to the memory of our friend and research colleague, Huw Collins, who sadly died unexpectedly during this project.

*Acknowledgements:* This study makes use of anonymised data held in the Secure Anonymised Information Linkage (SAIL) Databank. We would like to acknowledge all the data providers who make anonymised data available for research. We want to thank members of SAIL, especially Dr Sarah Rees, who supported the researchers during this project. We are also grateful to consultant psychiatrist colleagues Dr Ben Shooter, and Dr Adnan Sharaf, who provided insight into psychiatric APM use in the UK , clinic appointment structures and recall methods.

## References

1. Roberts R, Neasham A, Lambrinudi C, Khan A. A quantitative analysis of antipsychotic prescribing trends for the treatment of schizophrenia in England and Wales. *JRSM Open*. 2018; 9(4):2054270418758570. doi: 10.1177/2054270418758570. PubMed PMID: 29707225.
2. Joint Formulary Committee. British National Formulary. Treatment Summaries: Psychoses and related disorders (online) [Internet]. BMJ and Pharmaceutical Press, c2023 [cited 2024 Jun 1]. Available from: <https://bnf.nice.org.uk/treatment-summaries/psychoses-and-related-disorders/>.
3. Hardoon S, Hayes J, Viding E, McCrory E, Walters K, Osborn D. Prescribing of antipsychotics among people with recorded personality disorder in primary care: a retrospective nationwide cohort study using The Health Improvement Network primary care database. *BMJ Open*. 2022; 12(3): e053943. Epub 2022/03/11. doi: 10.1136/bmjopen-2021-053943. PubMed PMID: 35264346; PubMed Central PMCID: PMCPCMC8968526.
4. Alexander RT, Shankar R, Cooper SA, Bhaumik S, Hastings R, Kapugama CL, et al. Challenges and pitfalls of antipsychotic prescribing in people with learning disability. *Br J Gen Pract*. 2017; 67(661): 372-3. doi: 10.3399/bjgp17X692081.
5. Posey DJ, Stigler KA, Erickson CA, McDougale CJ. Antipsychotics in the treatment of autism. *J Clin Invest*. 2008; 118(1):6-14. Epub 2008/01/04. doi: 10.1172/jci32483. PubMed PMID: 18172517; PubMed Central PMCID: PMCPCMC2171144.
6. Comer JS, Mojtabai R, Olfson M. National Trends in the Antipsychotic Treatment of Psychiatric Outpatients With Anxiety Disorders. *Am J Psychiatry*. 2011; 168(10): 1057-65. doi: 10.1176/appi.ajp.2011.11010087. PubMed PMID: 21799067.
7. Marston L, Nazareth I, Petersen I, Walters K, Osborn DPJ. Prescribing of antipsychotics in UK primary care: a cohort study. *BMJ Open*. 2014; 4(12):e006135. doi: 10.1136/bmjopen-2014-006135.
8. National Institute for Health and Care Excellence. Psychosis and schizophrenia in adults: prevention and management. Clinical guideline. [Internet]. London: NICE, 2014. [cited 2024 Jun 1] Available from: <https://www.nice.org.uk/guidance/cg178>.
9. Osborn DP, Petersen I, Beckley N, Walters K, Nazareth I, Hayes J. Weight change over two years in people prescribed olanzapine, quetiapine and risperidone in UK primary care: Cohort study in THIN, a UK primary care database. *J Psychopharmacol*. 2018; 32(10): 1098-103. Epub 2018/06/26. doi: 10.1177/0269881118780011. PubMed PMID: 29938561.
10. Holt RIG. Association Between Antipsychotic Medication Use and Diabetes. *Curr Diab Rep*. 2019; 19(10): 96. Epub 2019/09/04. doi: 10.1007/s11892-019-1220-8. PubMed PMID: 31478094; PubMed Central PMCID: PMCPCMC6718373.
11. Correll CU, Solmi M, Veronese N, Bortolato B, Rosson S, Santonastaso P, et al. Prevalence, incidence and mortality from cardiovascular disease in patients with pooled and specific severe mental illness: a large-scale meta-analysis of 3,211,768 patients and 113,383,368 controls. *World Psychiatry*. 2017; 16(2): 163-80. Epub 2017/05/13. doi: 10.1002/wps.20420. PubMed PMID: 28498599; PubMed Central PMCID: PMCPCMC5428179.
12. Ashworth M, Schofield P, Das-Munshi J. Physical health in severe mental illness. *Br J Gen Pract* 2017; 67(663): 436-7. doi: 10.3399/bjgp17X692621.
13. Woodall A. Managing patients on atypical antipsychotics in primary care. *Prescriber*. 2021; 32(11-12): 18-23. doi: <https://doi.org/10.1002/psb.1952>.
14. Hayes JF, Marston L, Walters K, King MB, Osborn DPJ. Mortality gap for people with bipolar disorder and schizophrenia: UK-based cohort study 2000-2014. *Br J Psychiatry* 2017; 211(3): 175-81. Epub 2017/07/08. doi: 10.1192/bjp.bp.117.202606. PubMed PMID: 28684403; PubMed Central PMCID: PMCPCMC5579328.
15. John A, McGregor J, Jones I, Lee SC, Walters JTR, Owen MJ, et al. Premature mortality among people with severe mental illness - New evidence from linked primary care data. *Schizophr*

- Res. 2018; 199: 154-62. Epub 2018/05/08. doi: 10.1016/j.schres.2018.04.009. PubMed PMID: 29728293.
16. Woodall A, Prosser A, Griffiths M, Shooter B, Garfitt J, Walker L, et al. Cardiovascular risk estimation in rural psychiatric inpatient populations: Cross-sectional preliminary study. *Psychiatry Res Commun.* 2023; 3(1): 100103. doi: <https://doi.org/10.1016/j.psycom.2023.100103>.
17. Hippisley-Cox J, Coupland C, Brindle P. Development and validation of QRISK3 risk prediction algorithms to estimate future risk of cardiovascular disease: prospective cohort study. *BMJ.* 2017; 357 :j2099. Epub 2017/05/26. doi: 10.1136/bmj.j2099. PubMed PMID: 28536104; PubMed Central PMCID: PMC5441081
18. Woodall AA, Abuzour AS, Wilson SA, Mair FS, Buchan I, Sheard SB, et al. Management of antipsychotics in primary care: Insights from healthcare professionals and policy makers in the United Kingdom. *PLoS One.* 2024; 19(3): e0294974. Epub 2024/03/01. doi: 10.1371/journal.pone.0294974. PubMed PMID: 38427674; PubMed Central PMCID: PMC610906843 203986.
19. NHS England. Quality and outcomes framework guidance for 2023/24. 2024 [updated 15th April 2024; cited 13th June 2024]. Available from: <https://www.england.nhs.uk/long-read/quality-and-outcomes-framework-guidance-for-2023-24/>
20. Cooper RE, Hanratty É, Morant N, Moncrieff J. Mental health professionals' views and experiences of antipsychotic reduction and discontinuation. *PLoS One.* 2019; 14(6) :e0218711. Epub 2019/06/21. doi: 10.1371/journal.pone.0218711. PubMed PMID: 31220160; PubMed Central PMCID: PMC6586401.
21. Nash A, Kingstone T, Farooq S, Tunmore J, Chew-Graham C, A. Switching antipsychotics to support the physical health of people with severe mental illness: a qualitative study of healthcare professionals' perspectives. *BMJ Open.* 2021;11(2):e042497. doi: 10.1136/bmjopen-2020-042497.
22. Reilly S, Planner C, Hann M, Reeves D, Nazareth I, Lester H. The role of primary care in service provision for people with severe mental illness in the United Kingdom. *PLoS One.* 2012; 7(5): e36468. Epub 2012/05/23. doi: 10.1371/journal.pone.0036468. PubMed PMID: 22615769; PubMed Central PMCID: PMC3352919.
23. von Elm E, Altman DG, Egger M, Pocock SJ, Gøtzsche PC, Vandenbroucke JP. Strengthening the Reporting of Observational Studies in Epidemiology (STROBE) statement: guidelines for reporting observational studies. *BMJ.* 2007; 335(7624): 806-8. Epub 2007/10/20. doi: 10.1136/bmj.39335.541782.AD. PubMed PMID: 17947786; PubMed Central PMCID: PMC2034723.
24. Jones KH, Ford DV, Jones C, Dsilva R, Thompson S, Brooks CJ, et al. A case study of the Secure Anonymous Information Linkage (SAIL) Gateway: a privacy-protecting remote access system for health-related research and evaluation. *J Biomed Inform.* 2014; 50(100): 196-204. Epub 2014/01/21. doi: 10.1016/j.jbi.2014.01.003. PubMed PMID: 24440148; PubMed Central PMCID: PMC4139270.
25. Ford DV, Jones KH, Verplancke JP, Lyons RA, John G, Brown G, et al. The SAIL Databank: building a national architecture for e-health research and evaluation. *BMC Health Serv Res.* 2009; 9: 157. Epub 2009/09/08. doi: 10.1186/1472-6963-9-157. PubMed PMID: 19732426; PubMed Central PMCID: PMC2744675.
26. Lyons RA, Jones KH, John G, Brooks CJ, Verplancke JP, Ford DV, et al. The SAIL databank: linking multiple health and social care datasets. *BMC Med Inform Decis Mak.* 2009; 9: 3. Epub 2009/01/20. doi: 10.1186/1472-6947-9-3. PubMed PMID: 19149883; PubMed Central PMCID: PMC2648953.
27. Rodgers SE, Demmler JC, Dsilva R, Lyons RA. Protecting health data privacy while using residence-based environment and demographic data. *Health Place.* 2012; 18(2): 209-17. Epub 2011/10/15. doi: 10.1016/j.healthplace.2011.09.006. PubMed PMID: 21996431.

28. Rodgers SE, Lyons RA, Dsilva R, Jones KH, Brooks CJ, Ford DV, et al. Residential Anonymous Linking Fields (RALFs): a novel information infrastructure to study the interaction between the environment and individuals' health. *J Public Health (Oxf)*. 2009; 31(4): 582-8. Epub 2009/05/19. doi: 10.1093/pubmed/fdp041. PubMed PMID: 19447812.
29. Newcombe RG. Two-sided confidence intervals for the single proportion: comparison of seven methods. *Stat Med*. 1998; 17(8): 857-72. Epub 1998/05/22. doi: 10.1002/(sici)1097-0258(19980430)17:8<857::aid-sim777>3.0.co;2-e. PubMed PMID: 9595616.
30. Miettinen O, Nurminen M. Comparative analysis of two rates. *Stat Med*. 1985; 4(2): 213-26. Epub 1985/04/01. doi: 10.1002/sim.4780040211. PubMed PMID: 4023479.
31. Whiskey E, Barnard A, Oloyede E, Dzahini O, Taylor DM, Shergill SS. An evaluation of the variation and underuse of clozapine in the United Kingdom. *Acta Psychiatr Scand*. 2021; 143(4): 339-47. doi: <https://doi.org/10.1111/acps.13280>.
32. Mansour H, Mueller C, Davis KAS, Burton A, Shetty H, Hotopf M, et al. Severe mental illness diagnosis in English general hospitals 2006-2017: A registry linkage study. *PLoS Med*. 2020; 17(9): e1003306. Epub 2020/09/18. doi: 10.1371/journal.pmed.1003306. PubMed PMID: 32941435; PubMed Central PMCID: PMCPCMC7498001
33. Radojčić MR, Pierce M, Hope H, Senior M, Taxiarchi VP, Trefan L, et al. Trends in antipsychotic prescribing to children and adolescents in England: cohort study using 2000-19 primary care data. *Lancet Psychiatry*. 2023; 10(2): 119-28. Epub 2023/01/14. doi: 10.1016/s2215-0366(22)00404-7. PubMed PMID: 36638816.
34. Shoham N, Cooper C, Lewis G, Bebbington P, McManus S. Temporal trends in psychotic symptoms: Repeated cross-sectional surveys of the population in England 2000–14. *Schizophr Res*. 2021; 228: 97-102. doi: <https://doi.org/10.1016/j.schres.2020.11.057>.
35. Mok PLH, Carr MJ, Guthrie B, Morales DR, Sheikh A, Elliott RA, et al. Multiple adverse outcomes associated with antipsychotic use in people with dementia: population based matched cohort study. *BMJ*. 2024; 385: e076268. doi: 10.1136/bmj-2023-076268.
36. Grünwald LM, Duddy C, Byng R, Crellin N, Moncrieff J. The role of trust and hope in antipsychotic medication reviews between GPs and service users a realist review. *BMC Psychiatry*. 2021; 21(1): 390. Epub 2021/08/06. doi: 10.1186/s12888-021-03355-3. PubMed PMID: 34348680; PubMed Central PMCID: PMCPCMC8340528.
37. Kelly M, Dornan T, Pringsheim T. The lesser of two evils: a qualitative study of quetiapine prescribing by family physicians. *CMAJ Open*. 2018; 6(2): E191-e6. Epub 2018/05/02. doi: 10.9778/cmajo.20170145. PubMed PMID: 29712643; PubMed Central PMCID: PMCPCMC7869656.
38. National Institute for Health and Care Excellence. Borderline Personality Disorder: recognition and treatment. Clinical guideline. [Internet]. London: NICE, 2009. [cited 2024 Jun 1] Available from: <https://www.nice.org.uk/guidance/cg78>
39. Abuzour AS, Wilson SA, Woodall AA, Mair FS, Clegg A, Shantsila E, et al. A qualitative exploration of barriers to efficient and effective Structured Medication Reviews in Primary Care: Findings from the DynAIRx study. *medRxiv*. 2024: 2024.04.18.24303004. Available from: doi: 10.1101/2024.04.18.24303004.

|                                                   | QOF Register (annual contract requirements)           |                                        |                              |                                      |
|---------------------------------------------------|-------------------------------------------------------|----------------------------------------|------------------------------|--------------------------------------|
|                                                   | SMI                                                   | Dementia                               | Depression                   | No register                          |
| <b>Patients taking APM with typical diagnoses</b> | Schizophrenia; Bipolar disorder; Psychotic depression | Vascular dementia; Alzheimer's disease | Moderate depressive disorder | Generalised anxiety disorder; Autism |
| <b>Registration</b>                               | Yes                                                   | Yes                                    | Yes                          | No                                   |
| <b>GP review</b>                                  | Yes                                                   | Yes                                    | Yes                          | No                                   |
| <b>Blood pressure</b>                             | Yes                                                   | No                                     | No                           | No                                   |
| <b>BMI</b>                                        | Yes                                                   | No                                     | No                           | No                                   |
| <b>Lipids</b>                                     | Yes                                                   | No                                     | No                           | No                                   |
| <b>HBA1c /glucose</b>                             | Yes                                                   | Yes                                    | No                           | No                                   |
| <b>Alcohol consumption</b>                        | Yes                                                   | No                                     | No                           | No                                   |

**Table S1: Typical QOF register contractual requirements in the Primary Care GP Contract.**

These contractual requirements varied from UK nation to nation over the study period. The table shows the typical monitoring that a patient with a diagnosis would experience according to each register.

612

Table S2: Counts of patients (all ages) on long-term APM and licenced indications in UK national formulary.

613

| Antipsychotic   | Read code (5-digit) | Count<br>(2011) | Relative<br>proportion<br>(%) (2011) | Count<br>(2020) | Relative<br>Proportion (%)<br>(2020) | First or<br>Second<br>Generation | Licensed indication in UK British National Formulary (2024)                                                    |                                        |                                                                              |                                                                          |         |                                                            |                                              |
|-----------------|---------------------|-----------------|--------------------------------------|-----------------|--------------------------------------|----------------------------------|----------------------------------------------------------------------------------------------------------------|----------------------------------------|------------------------------------------------------------------------------|--------------------------------------------------------------------------|---------|------------------------------------------------------------|----------------------------------------------|
|                 |                     |                 |                                      |                 |                                      |                                  | Psychosis/agitation in Serious<br>Mental Illness (Schizophrenia,<br>Bipolar Disorder, Psychotic<br>Depression) | Psychosis in<br>Parkinson's<br>Disease | Management of<br>Behavioural and<br>Psychological<br>Symptoms in<br>Dementia | Depression<br>(adjunctive<br>treatment,<br>psychosis<br>not<br>required) | Anxiety | Control of<br>deviant<br>antisocial<br>sexual<br>behaviour | Non-<br>psychiatric<br>uses (e.g.<br>nausea) |
| Quetiapine      | d4s..               | 6362            | 28.0                                 | 12338           | 37.1                                 | 2                                | YES                                                                                                            | NO                                     | NO                                                                           | YES                                                                      | NO      | NO                                                         | NO                                           |
| Olanzapine      | d4r.. OR d58..      | 5430            | 23.9                                 | 7527            | 22.6                                 | 2                                | YES                                                                                                            | NO                                     | NO                                                                           | NO                                                                       | NO      | NO                                                         | NO                                           |
| Risperidone     | d4p..               | 3377            | 14.8                                 | 5106            | 15.3                                 | 2                                | YES                                                                                                            | NO                                     | NO                                                                           | NO                                                                       | NO      | NO                                                         | NO                                           |
| Amisulpride     | d4t..               | 1531            | 6.7                                  | 1190            | 3.6                                  | 2                                | YES                                                                                                            | NO                                     | NO                                                                           | NO                                                                       | NO      | NO                                                         | NO                                           |
| Aripiprazole    | d4v..               | 1381            | 6.1                                  | 4303            | 12.9                                 | 2                                | YES                                                                                                            | NO                                     | NO                                                                           | NO                                                                       | NO      | NO                                                         | NO                                           |
| Haloperidol     | d47.. OR d55..      | 997             | 4.4                                  | 825             | 2.5                                  | 1                                | YES                                                                                                            | NO                                     | YES                                                                          | NO                                                                       | NO      | NO                                                         | YES                                          |
| Chlorpromazine  | d41..               | 971             | 4.3                                  | 633             | 1.9                                  | 1                                | YES                                                                                                            | NO                                     | NO                                                                           | NO                                                                       | YES     | NO                                                         | YES                                          |
| Trifluoperazine | d4h..               | 669             | 2.9                                  | 117             | 0.4                                  | 1                                | YES                                                                                                            | NO                                     | NO                                                                           | NO                                                                       | YES     | NO                                                         | YES                                          |
| Pericyazine     | d4a..               | 576             | 2.5                                  | 176             | 0.5                                  | 1                                | YES                                                                                                            | NO                                     | NO                                                                           | NO                                                                       | YES     | NO                                                         | NO                                           |
| Promazine       | d4e..               | 508             | 2.2                                  | 244             | 0.7                                  | 1                                | YES                                                                                                            | NO                                     | NO                                                                           | NO                                                                       | NO      | NO                                                         | YES                                          |
| Sulpride        | d4f..               | 490             | 2.2                                  | 271             | 0.8                                  | 1                                | YES                                                                                                            | NO                                     | NO                                                                           | NO                                                                       | NO      | NO                                                         | NO                                           |
| Zuclopenthixol  | d4j.. OR d57        | 211             | 0.9                                  | 257             | 0.8                                  | 1                                | YES                                                                                                            | NO                                     | NO                                                                           | NO                                                                       | NO      | NO                                                         | NO                                           |
| Flupentixol     | d51..               | 159             | 0.7                                  | 104             | 0.3                                  | 1                                | YES                                                                                                            | NO                                     | NO                                                                           | YES                                                                      | NO      | NO                                                         | NO                                           |
| Benperidol      | d42..               | 39              | 0.2                                  | 34              | 0.1                                  | 1                                | NO                                                                                                             | NO                                     | NO                                                                           | NO                                                                       | NO      | YES                                                        | NO                                           |
| Pimozide        | d4c..               | 23              | 0.1                                  | 10              | 0.0                                  | 1                                | YES                                                                                                            | NO                                     | NO                                                                           | NO                                                                       | NO      | NO                                                         | NO                                           |
| Clozapine       | d4l..               | 14              | 0.1                                  | 8               | 0.0                                  | 2                                | YES                                                                                                            | YES                                    | NO                                                                           | NO                                                                       | NO      | NO                                                         | NO                                           |
| Paliperidone    | d4w..               | <5              | 0.0                                  | 14              | 0.0                                  | 2                                | YES                                                                                                            | NO                                     | NO                                                                           | NO                                                                       | NO      | NO                                                         | NO                                           |
| Asenapine       | d4x..               | <5              | 0.0                                  | <5              | 0.0                                  | 2                                | YES                                                                                                            | NO                                     | NO                                                                           | NO                                                                       | NO      | NO                                                         | NO                                           |
| Cariprazine     | not listed in d4..  | <5              | 0.0                                  | <5              | 0.0                                  | 2                                | YES                                                                                                            | NO                                     | NO                                                                           | NO                                                                       | NO      | NO                                                         | NO                                           |
| Lurasidone      | d4y..               | <5              | 0.0                                  | <5              | 0.0                                  | 2                                | YES                                                                                                            | NO                                     | NO                                                                           | NO                                                                       | NO      | NO                                                         | NO                                           |
| Droperidol      | d44..               | <5              | 0.0                                  | <5              | 0.0                                  | 1                                | NO                                                                                                             | NO                                     | NO                                                                           | NO                                                                       | NO      | NO                                                         | YES                                          |

|                                                                                                           |                                                                                                           |       |       |       |      |     |     |    |    |    |     |    |     |
|-----------------------------------------------------------------------------------------------------------|-----------------------------------------------------------------------------------------------------------|-------|-------|-------|------|-----|-----|----|----|----|-----|----|-----|
| Loxapine                                                                                                  | d4k..                                                                                                     | <5    | 0.0   | <5    | 0.0  | 1   | YES | NO | NO | NO | NO  | NO | NO  |
| Zuclopenthixol acetate                                                                                    | d4n..                                                                                                     | <5    | 0.0   | <5    | 0.0  | 1   | YES | NO | NO | NO | NO  | NO | NO  |
| Prochlorperazine as antipsychotic (excluded from 'total APM count as not used as an antipsychotic in UK)* | D4d.. (Dhe.. Antiemetic code use is not captured under d4 code)                                           | <5    | N/A   | <5    | N/A  | N/A | YES | NO | NO | NO | YES | NO | YES |
| Levomepromazine (excluded from 'total APM count as not used as an antipsychotic in UK)*                   | d48..                                                                                                     | 68    | N/A   | 158   | N/A  | N/A | YES | NO | NO | NO | NO  | NO | YES |
| Total (individual APM counts)                                                                             |                                                                                                           | 22773 | 100.1 | 33187 | 99.7 | N/A |     |    |    |    |     |    |     |
| Total (top 6 APM used in 2020)                                                                            |                                                                                                           | 19078 | 83.9  | 31289 | 94.0 | N/A |     |    |    |    |     |    |     |
| Total 1 <sup>st</sup> Generation APM                                                                      |                                                                                                           | 4658  | 20.5  | 2686  | 8.1  | N/A |     |    |    |    |     |    |     |
| Total 2 <sup>nd</sup> Generation APM                                                                      |                                                                                                           | 18115 | 79.7  | 30501 | 91.7 | N/A |     |    |    |    |     |    |     |
| "ALL APM Total"                                                                                           | codes d4... and d5... excluding any prochlorperazine antiemetic codes (dhe..) and levomepromazine codes ( | 22119 | N/A   | 32086 | N/A  | N/A |     |    |    |    |     |    |     |
| All APM total as a % of summation of individual APM count                                                 |                                                                                                           | 97.1  | N/A   | 96.7  | N/A  | N/A |     |    |    |    |     |    |     |

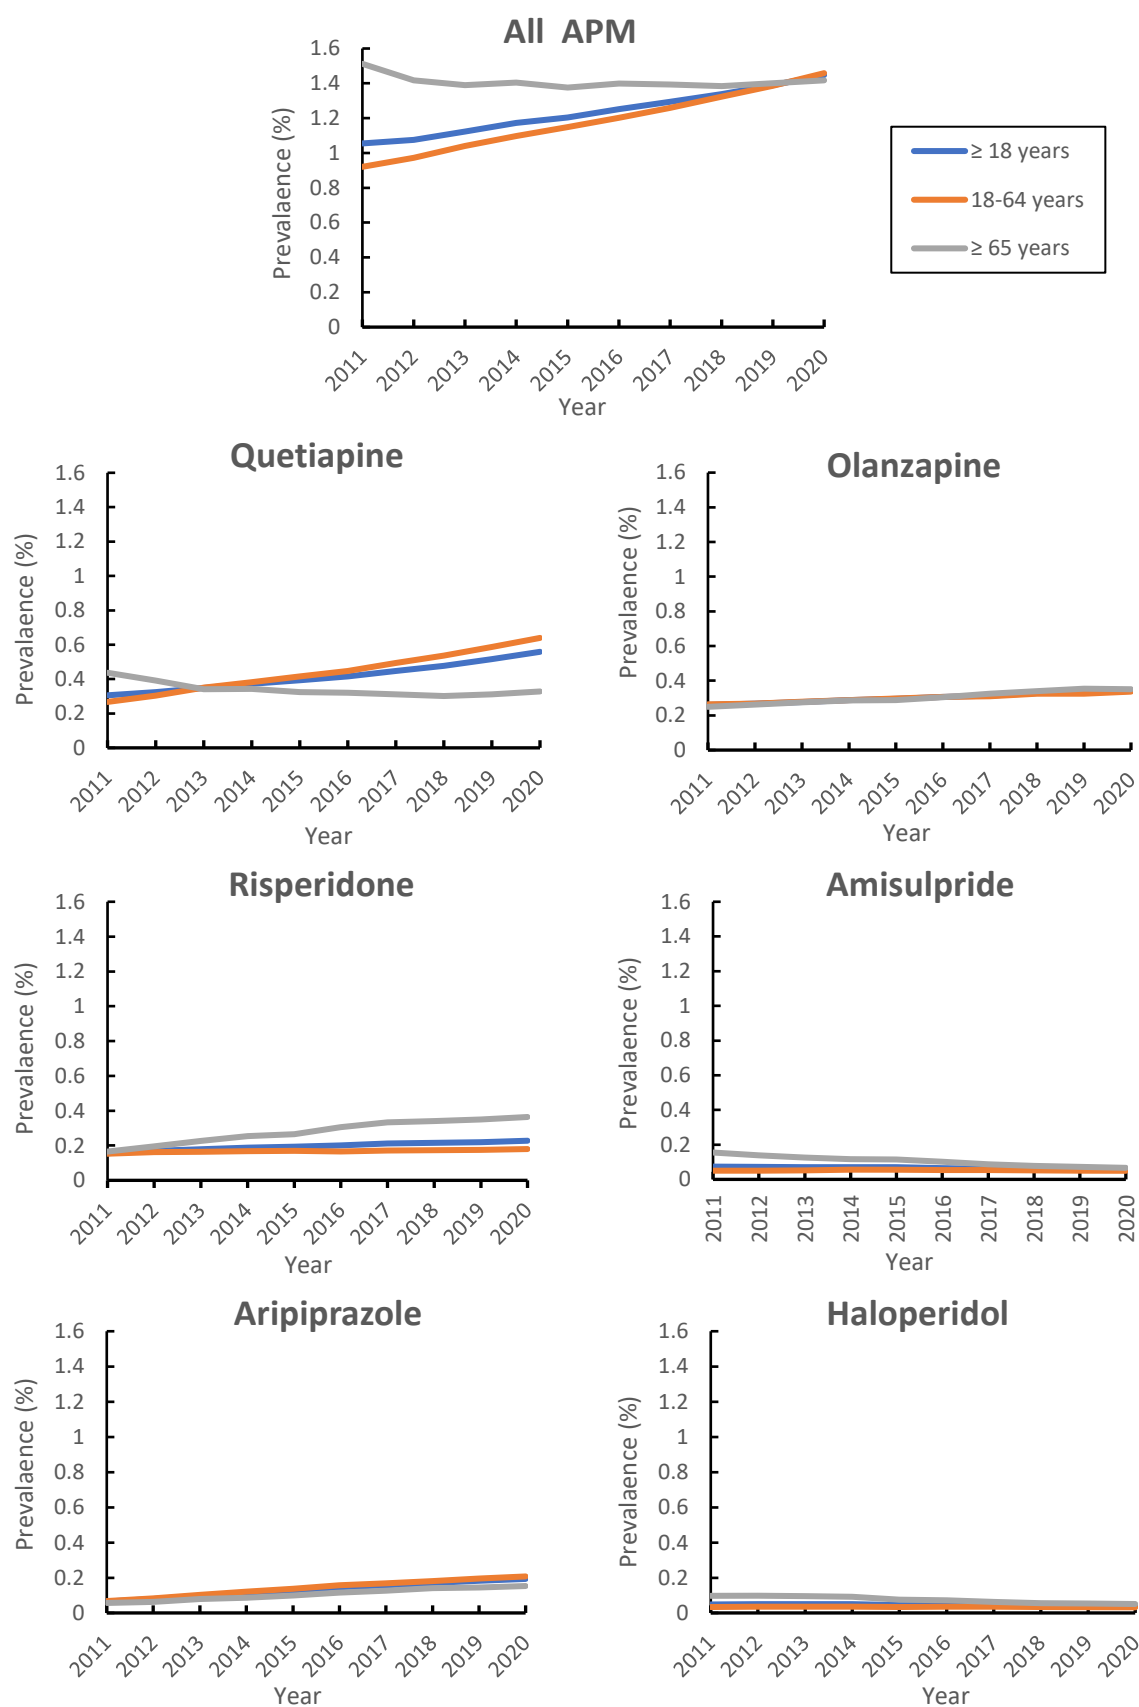

**Figure S1: Prevalence of long-term APM use between 2011 and 2020**

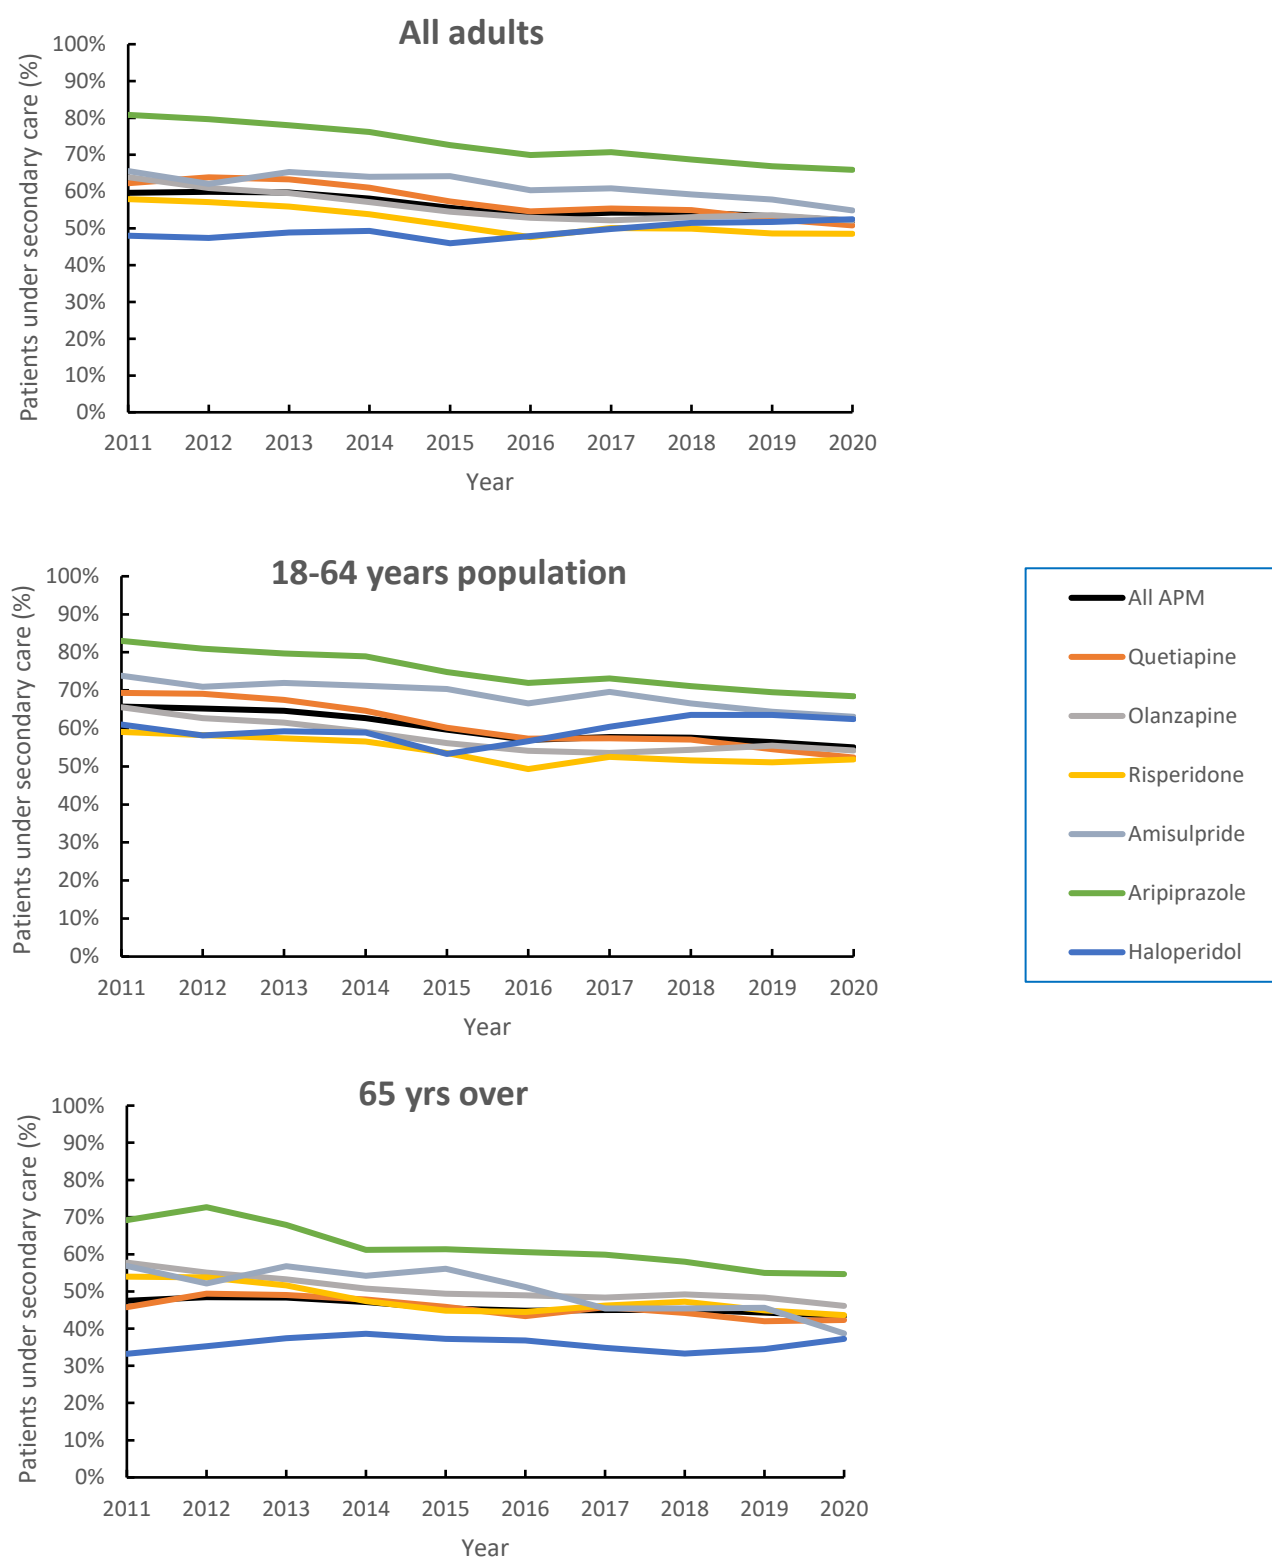

**Figure S2: Proportions of patients taking long-term APM who have had psychiatric review in previous 12 months**

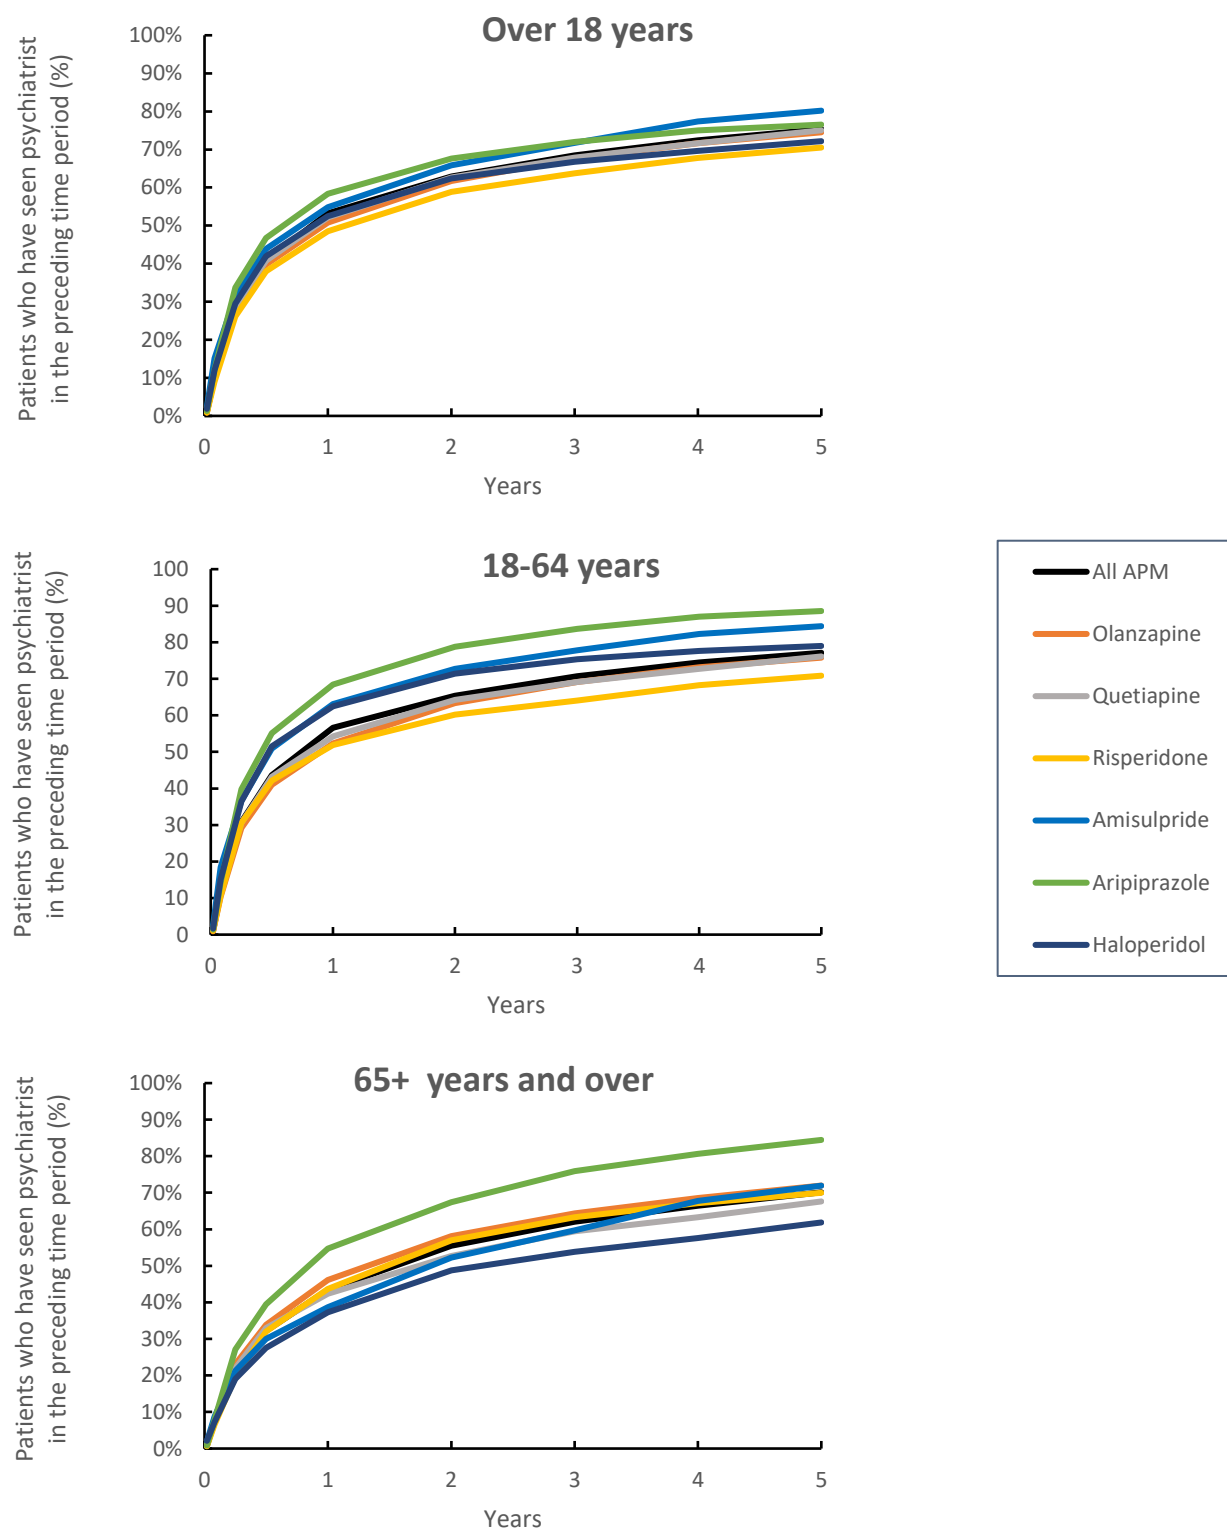

**Figure S3: Proportions of patients in 2020 prescribed -long APM who have had psychiatric review in the preceding time period of up to 5 years**

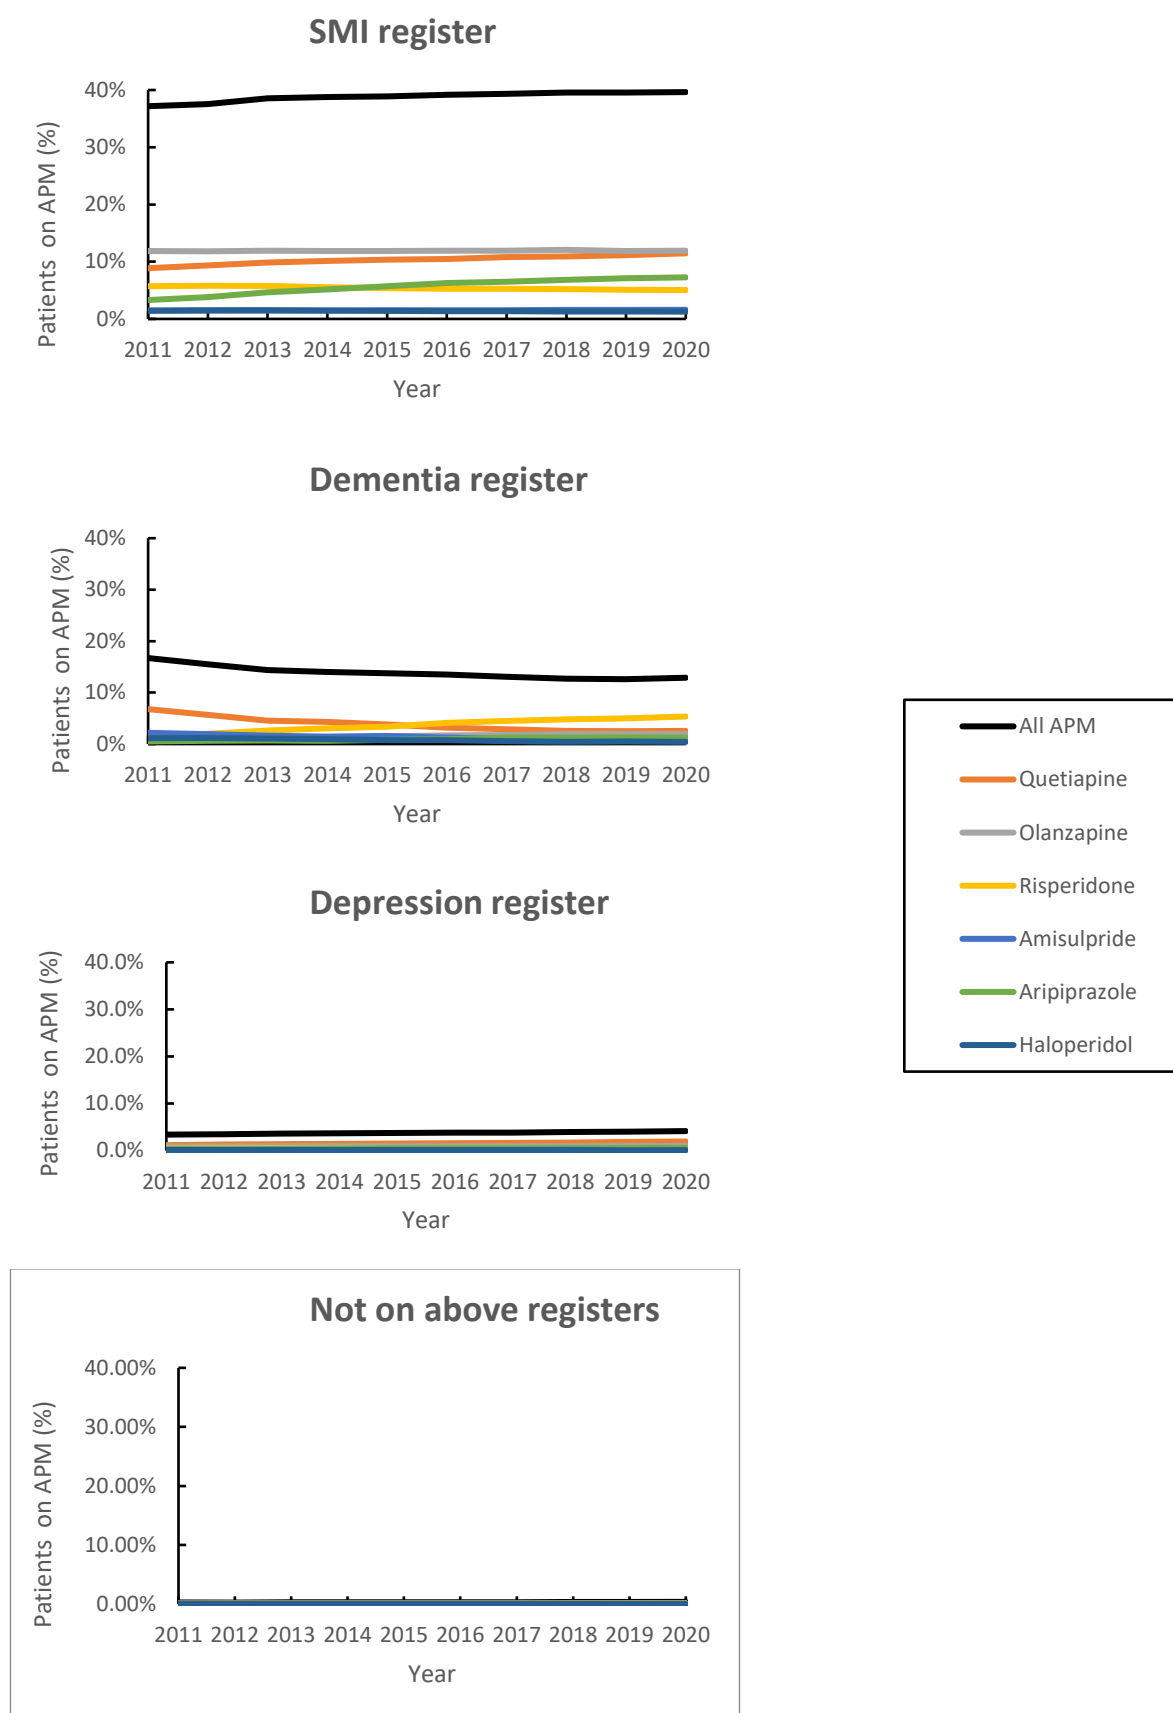

**Figure S4: Proportions of patients on QOF registers prescribed long-term APM**

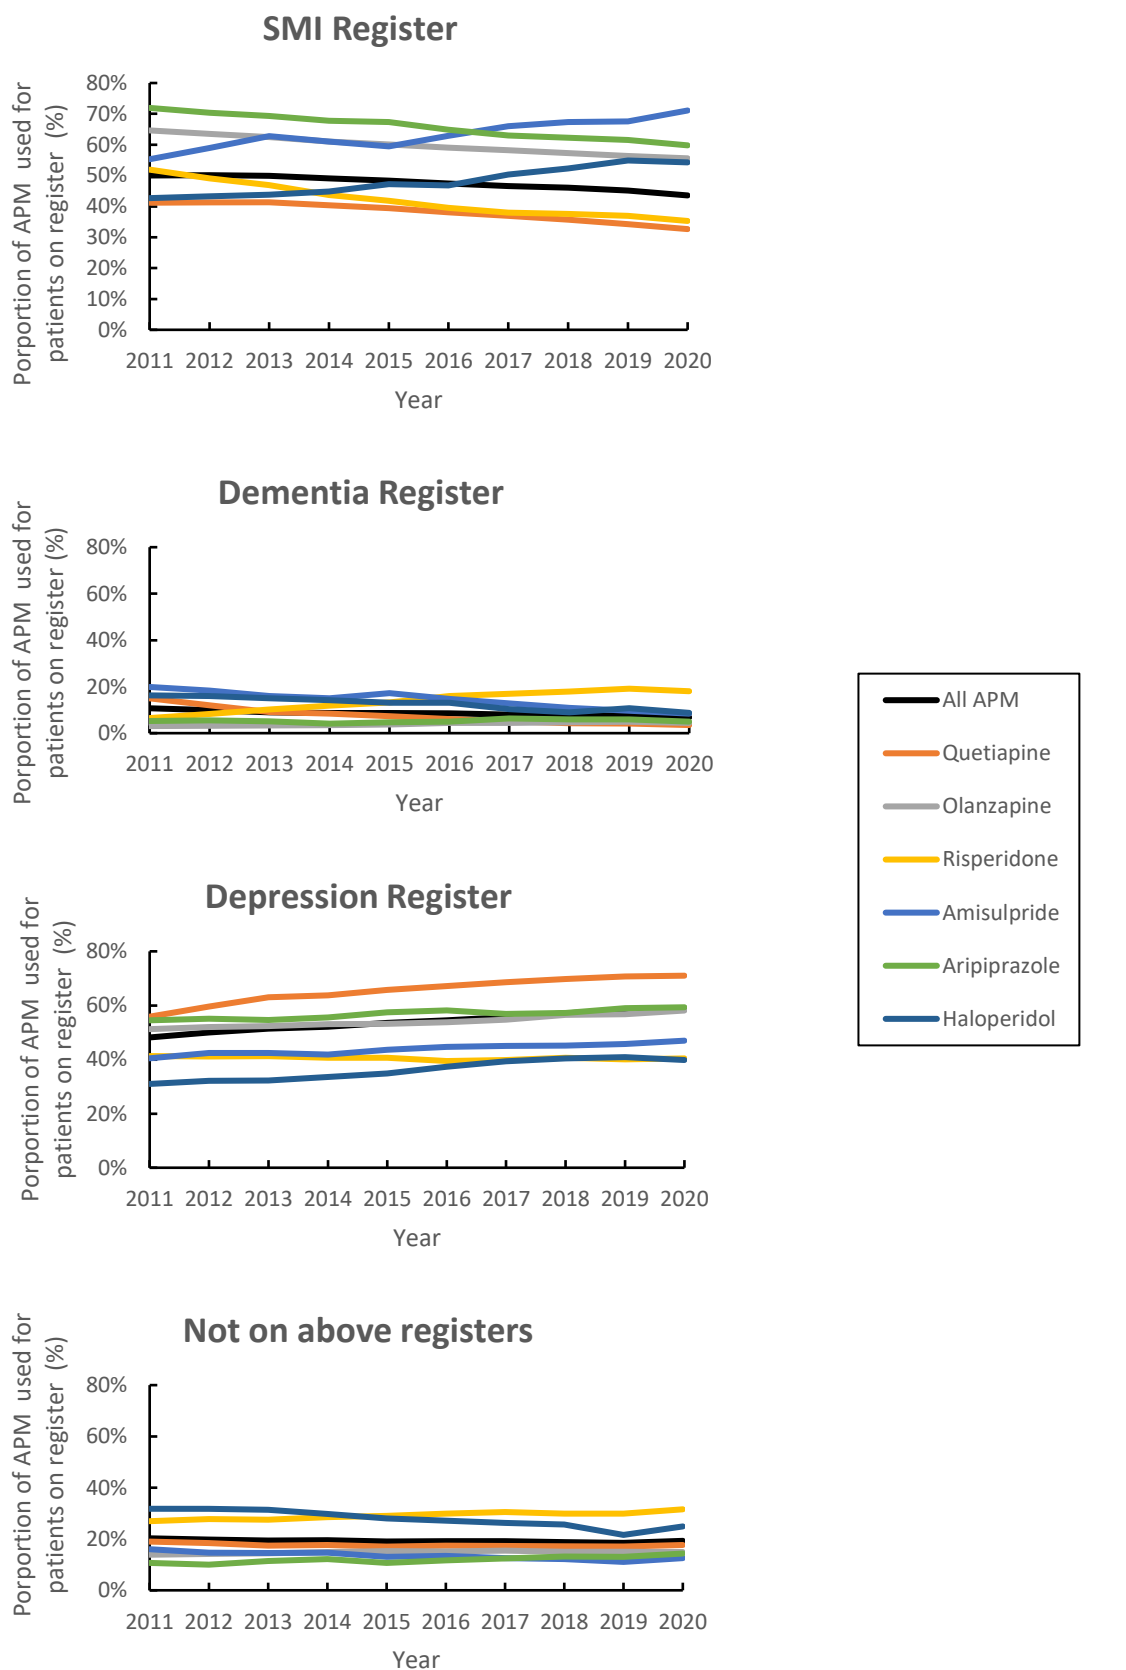

**Figure S5: Proportion of total APM prescribed to patients on each QOF register**
